# 1 Null effects of levodopa on reward- and 2 error-based motor adaptation, savings, and 3 anterograde interference 4

5 Dimitrios J. Palidis <sup>1,2,3</sup>, Heather R. McGregor <sup>4</sup>, Andrew Vo <sup>5</sup>, Penny A. MacDonald  
6 <sup>1,2,3,6,7 #</sup>, Paul L. Gribble <sup>1,2,6,8 # \*</sup>

- 7
- 8 1. The Brain and Mind Institute, Western University, London, ON, N6A 57B, Canada
- 9 2. Dept. Psychology, Western University, London, ON, N6A 5C2, Canada
- 10 3. Graduate Program in Neuroscience, Schulich School of Medicine & Dentistry, Western University, London, ON,  
11 N6A 3K7, Canada
- 12 4. Dept. of Applied Physiology and Kinesiology, University of Florida, Gainesville, FL, USA
- 13 5. Dept. of Neurology and Neurosurgery, Montreal Neurological Institute, McGill University, Montreal, QC, H3A  
14 2B4, Canada
- 15 6. Dept. Physiology & Pharmacology, Schulich School of Medicine & Dentistry, Western University, London, ON,  
16 N6A 5C1 Canada
- 17 7. Dept. of Clinical Neurological Sciences, University of Western Ontario, London, ON, N6A 5A5, Canada
- 18 8. Haskins Laboratories, New Haven, CT, 06511, USA

19  
20 # Co-senior authors

21 \* Corresponding author: Paul Gribble, [pgribble@uwo.ca](mailto:pgribble@uwo.ca)  
22  
23

24 **Author Contributions:** DJP, HRM, PAM, PLG designed research, DJP, AV performed  
25 research, DJP analyzed data, DJP wrote the paper, DJP, HRM, AV, PAM, PLG edited  
26 the paper.  
27

28 Authors report no conflict of interest.  
29

30 **Funding sources:** This work was supported by the Natural Science and Engineering  
31 Council of Canada (RGPIN-2018-05458 to PLG and RGPIN-2019-i07300 to PAM) and  
32 the Canada Research Chair program (PAM). DJP was supported by a graduate  
33 scholarship from NSERC. HRM was supported by a NSERC postdoctoral fellowship.  
34

35 **Abbreviated Title:** Null effects of levodopa on motor adaptation  
36

37 **Keywords:** motor adaptation, reward, reinforcement, FRN, reward positivity, dopamine

## 38 **Abstract**

39  
40 Dopamine signaling is thought to mediate reward-based learning. We tested for a role of  
41 dopamine in motor adaptation by administering the dopamine precursor levodopa to  
42 healthy participants in two experiments involving reaching movements. Levodopa has  
43 been shown to impair reward-based learning in cognitive tasks. Thus, we hypothesized  
44 that levodopa would selectively impair aspects of motor adaptation that depend on  
45 reinforcement of rewarding actions.

46  
47 In the first experiment, participants performed two separate tasks in which adaptation  
48 was driven either by visual error-based feedback of the hand position or binary reward  
49 feedback. We used EEG to measure event-related potentials evoked by task feedback.  
50 We hypothesized that levodopa would specifically diminish adaptation and the neural  
51 responses to feedback in the reward learning task. However, levodopa did not affect  
52 motor adaptation in either task nor did it diminish event-related potentials elicited by  
53 reward outcomes.

54  
55 In the second experiment, participants learned to compensate for mechanical force field  
56 perturbations applied to the hand during reaching. Previous exposure to a particular  
57 force field can result in savings during subsequent adaptation to the same force field or  
58 interference during adaptation to an opposite force field. We hypothesized that levodopa  
59 would diminish savings and anterograde interference, as previous work suggests that  
60 these phenomena result from a reinforcement learning process. However, we found no  
61 reliable effects of levodopa.

62  
63 These results suggest that reward-based motor adaptation, savings, and interference  
64 may not depend on the same dopaminergic mechanisms that have been shown to be  
65 disrupted by levodopa during various cognitive tasks.

## 66 67 **New and Noteworthy**

68  
69 Motor adaptation relies on multiple processes including reinforcement of successful  
70 actions. Cognitive reinforcement learning is impaired by levodopa-induced disruption of  
71 dopamine function. We administered levodopa to healthy adults who participated in  
72 multiple motor adaptation tasks. We found no effects of levodopa on any component of  
73 motor adaptation. This suggests that motor adaptation may not depend on the same  
74 dopaminergic mechanisms as cognitive forms or reinforcement learning that have been  
75 shown to be impaired by levodopa.

## 76 Introduction

77  
78 Human motor control is adaptive to changes of the environment and the body through  
79 multiple mechanisms including reinforcement of successful actions and recalibration of  
80 internal mappings between motor commands and sensory outcomes (Huang et al.,  
81 2011; Izawa & Shadmehr, 2011; J. A. Taylor et al., 2014; Wolpert et al., 1995). Two  
82 prominent experimental models of motor adaptation are force field adaptation and  
83 visuomotor rotation (VMR) tasks. In studies of force field adaptation, a robot applies  
84 velocity-dependent forces to the hand during reaches to targets. In visuomotor rotation  
85 tasks, a cursor on a digital display represents the position of the hand, and the mapping  
86 between the actual reach angle and the position of the cursor is rotated. In both tasks  
87 participants quickly adapt their movements to compensate for the experimentally  
88 induced perturbations. Learning involves the cerebellum, and parietal, sensory, and  
89 motor cortical areas (Diedrichsen et al., 2005; Ito, 2000; Krakauer et al., 2004; Smith &  
90 Shadmehr, 2005; Tanaka et al., 2009; Jordan A. Taylor et al., 2010; Wong et al., 2019).  
91 It is thought that these neural circuits predict the sensory consequences of motor  
92 commands, and that adaptation occurs in response to sensory prediction error when  
93 sensory afference violates these predictions (Adams et al., 2013; Bhanpuri et al., 2013;  
94 Izawa & Shadmehr, 2011; R. Chris Miall et al., 2007; Shadmehr et al., 2010; Synofzik et  
95 al., 2008; Therrien & Bastian, 2015; Tseng et al., 2007; Wolpert et al., 1995).

96  
97 While sensory error-based learning mechanisms are dominant in typical motor  
98 adaptation paradigms, influences of reinforcement learning processes are increasingly  
99 recognized (Bernardi et al., 2015; Cashaback et al., 2019; Izawa & Shadmehr, 2011;  
100 Kim et al., 2019; Kooij et al., 2018; McDougle et al., 2016; Mehler et al., 2017; Nikooyan  
101 & Ahmed, 2014; Palidis et al., 2019; Sidarta et al., 2016, 2018; van der Kooij & Smeets,  
102 2019). Reward and task success can modulate sensory error-based learning (Galea et  
103 al., 2015; Kim et al., 2019; Kooij et al., 2018; Kuling et al., 2019; Leow et al., 2018,  
104 2020; Shmuelof et al., 2012). Reinforcement learning and sensory error-based learning  
105 can also contribute to adaptation as separable processes. Adaptation to sensory error  
106 has been shown to occur automatically even when it interferes with task success  
107 (Mazzoni & Krakauer, 2006). Reward-based adaptation can be isolated experimentally  
108 by providing only binary reinforcement feedback indicating success or failure (Izawa &  
109 Shadmehr, 2011; Shmuelof et al., 2012). When sensory error-based learning cannot  
110 occur due to impoverished sensory feedback or cerebellar damage, reward-based  
111 learning can produce comparable behavioral adaptation (Cashaback et al., 2017; Izawa  
112 & Shadmehr, 2011; Therrien et al., 2016).

113  
114 It is thought that reward prediction error drives biological reinforcement learning when  
115 an action results in an outcome that is better or worse than expected (Daw & Tobler,  
116 2014; Sambrook & Goslin, 2015; Walsh & Anderson, 2012). Phasic changes in the firing  
117 rate of midbrain dopamine neurons match reward prediction error signals predicted by  
118 computational models of reinforcement learning (Bayer & Glimcher, 2005; García-García et  
119 al., 2017; Jocham & Ullsperger, 2009; Schultz et al., 1997; Watabe-Uchida et al., 2017). These  
120 dopaminergic signals are thought to mediate synaptic plasticity in the striatum and

121 frontal cortex underlying reward-based learning (Otani et al., 2003; Reynolds &  
122 Wickens, 2002; Wang et al., 2018).

123  
124 Levodopa is a dopamine precursor commonly used to treat motor symptoms in patients  
125 with Parkinson's disease. Levodopa has been shown to impair reward-based learning in  
126 both patients and healthy participants (Cools et al., 2001, 2007; Feigin et al., 2003;  
127 Frank et al., 2004; Graef et al., 2010; Hiebert et al., 2014; Jahanshahi et al., 2010; Kwak  
128 et al., 2010; MacDonald et al., 2011; Swainson et al., 2000; Torta et al., 2009; Vo et al.,  
129 2016, 2018). According to the "dopamine overdose" hypothesis, dopamine levels affect  
130 performance in tasks that depend on the striatum according to an inverted-u function  
131 (Cools et al., 2007). In early-stage Parkinson's disease, the dorsal striatum is  
132 significantly depleted of dopamine whereas the ventral striatum is comparatively spared.  
133 Dopaminergic therapy is predicted to ameliorate deficits caused by dopamine-depletion  
134 in the dorsal striatum but to worsen functions ascribed to the ventral striatum. In line  
135 with this view, reward-based learning is thought to rely on dopamine signaling in ventral  
136 striatum and is impaired by levodopa.

137  
138 Although dopamine is widely implicated in reward-based learning, it is not clear whether  
139 this role extends to reward-based motor adaptation. We administered levodopa to  
140 healthy young participants to test for effects on motor adaptation. In our first experiment,  
141 participants received levodopa and placebo in separate sessions using a repeated  
142 measures design. Both sessions included a reward-based learning task and a sensory  
143 error-based VMR task. In the reward-based learning task, adaptation was induced  
144 through binary reinforcement feedback at the end of each movement. We measured  
145 changes in the mean reach angle due to reinforcement as well as modulations in trial-  
146 by-trial variability of reach angle as a response to reward outcomes. Previous research  
147 has shown that motor variability increases following unrewarded outcomes compared to  
148 rewarded outcomes (Dhawale et al., 2019; Holland et al., 2018; Mastrigt et al., 2020;  
149 Pekny et al., 2015; van der Kooij & Smeets, 2019). This could indicate reinforcement of  
150 rewarded actions as well as exploration in response to unrewarded outcomes  
151 (Cashaback et al., 2019; Dhawale et al., 2019). This variance modulation is impaired in  
152 individuals with Parkinson's disease who are medicated, but it remains unclear whether  
153 this deficit is caused by the disease process itself or side-effects of dopaminergic  
154 medication (Pekny et al., 2015). We predicted that levodopa would impair reward-based  
155 motor adaptation and modulation of trial-by-trial variability in accordance with the  
156 "dopamine overdose hypothesis".

157  
158 In the sensory error-based learning task, participants adapted to visuomotor rotation  
159 perturbations designed to produce sensory prediction error while minimizing reward  
160 prediction error. Investigations as to whether VMR learning depends on dopamine have  
161 shown inconsistent results (Bédard & Sanes, 2011; Marinelli et al., 2009; Mongeon et al.,  
162 2013; Noohi et al., 2014). Sensory error-based learning may be mediated by non-  
163 dopaminergic mechanisms depending primarily on the cerebellum, whereas dopamine  
164 affects VMR learning through additional or modulatory contributions of a reinforcement  
165 learning process (Singh et al., 2019). We hypothesized that sensory error-based

166 learning would be unaffected by levodopa. As such, we designed our sensory error-  
167 based learning task to preclude effects of reinforcement.

168  
169 In experiment 1, we recorded EEG to measure neural event-related potentials (ERPs).  
170 Previously, we found that a medial frontal ERP component called the feedback related  
171 negativity, or alternatively the reward positivity (FRN/RP), was modulated by reward  
172 feedback but not sensory error feedback during motor adaptation (Palidis et al., 2019).  
173 This is consistent with a prominent theory stating that the FRN/RP reflects reward  
174 prediction error signals driven by dopamine release (Becker et al., 2014; Carlson et al.,  
175 2011; Emeric et al., 2008; Foti et al., 2011; Gehring & Willoughby, 2002; Hauser et al.,  
176 2014; Holroyd et al., 2008; Holroyd & Coles, 2002; Mathewson et al., 2008; Miltner et  
177 al., 1997; Sambrook & Goslin, 2015, 2016; Vezoli & Procyk, 2009; Walsh & Anderson,  
178 2012; Warren et al., 2015). However, direct evidence for a link between dopamine and  
179 the FRN/RP is fairly limited, and no studies have investigated this link in the context of  
180 motor adaptation (Enge et al., 2017; Forster et al., 2017; Marco-Pallarés et al., 2009; Mueller  
181 et al., 2014; Santesso et al., 2009; Schutte et al., 2020). We hypothesized that levodopa  
182 would diminish the magnitude of the FRN/RP along with behavioral expression of  
183 reward-based learning in accordance with the “dopamine overdose” hypothesis.

184  
185 In experiment 2, participants ingested either levodopa or placebo prior to performing a  
186 force field adaptation task. We tested for effects of levodopa on savings, in which  
187 adaptation is facilitated when a particular perturbation is encountered a second time  
188 after washout of initial learning. We also tested for effects of levodopa on anterograde  
189 interference, in which adaptation to a force field in a particular direction causes  
190 interference with subsequent adaptation to an opposite-direction force field (Bock et al.,  
191 2001; Huang et al., 2011; Leow et al., 2012, 2013; R. Christopher Miall et al., 2004;  
192 Sing & Smith, 2010). While force field adaptation is thought to rely primarily on sensory  
193 error-based learning mechanisms, savings and anterograde interference can be  
194 accounted for by additional influences of a reinforcement learning process (Huang et al.,  
195 2011). Individuals with Parkinson's disease show reduced savings and interference  
196 despite intact initial adaptation (Bédard & Sanes, 2011; Leow et al., 2012, 2013). While  
197 these results suggest a role of dopamine in savings and interference, they typically don't  
198 distinguish between effects of Parkinson's disease and side-effects of medication. We  
199 used pharmacological manipulation in healthy participants to provide a more specific  
200 and controlled test for a role of dopamine in savings and interference. We predicted that  
201 levodopa would impair savings and interference while leaving initial adaptation  
202 unaffected.

203  
204 We tested for effects of levodopa using a comprehensive battery of motor adaptation  
205 tasks. This allowed us to test the hypotheses that dopaminergic mechanisms  
206 specifically underlie adaptive motor responses to reward outcomes as well as the  
207 formation of motor memories that produce savings and interference effects. We also  
208 measured the FRN/RP, a common neural correlate of reward prediction error. This  
209 allowed us to test the hypothesis that dopaminergic signaling of reward prediction error  
210 in the medial frontal cortex drives reward-based motor adaptation.

211

## 212 **Methods**

213

### 214 **Experiment 1**

215

#### 216 ***Participants***

217

218 A total of  $n=21$  [12 female, Age: 20.99 years (SD 3.26)] healthy, right-handed  
219 participants were included in experiment 1. All participants were screened for  
220 neurological and psychiatric illness, history of drug or alcohol abuse, and  
221 contraindications for levodopa. Two participants were excluded due to malfunction of  
222 the robot that prevented the experiment from being completed, and two participants  
223 were excluded who did not return for the second testing session. Participants provided  
224 written informed consent to experimental procedures approved by the Research Ethics  
225 Board at Western University.

226

#### 227 ***Experimental design***

228

229 *Drug administration:* All participants underwent two experimental sessions, with  
230 levodopa and placebo being administered in separate sessions using a randomized,  
231 double-blind, crossover design. The two sessions were separated by a washout period  
232 of at least one week. In one session, a capsule was ingested that contained 100 mg of  
233 levodopa (L-3,4-dihydroxyphenylalanine) and 25 mg of carbidopa. Levodopa is a  
234 dopamine precursor, and carbidopa is a decarboxylase inhibitor given to reduce  
235 conversion of levodopa to dopamine in the periphery. This dose has been shown to  
236 produce various behavioral effects in healthy young adults (Flöel et al., 2005; Knecht et al.,  
237 2004; Onur et al., 2011; Vo et al., 2016, 2017, 2018). In the other session, an equal volume  
238 of placebo was administered in an identical capsule. The order of administration was  
239 counterbalanced. After administration of the capsule, the robot was calibrated, the EEG  
240 cap was placed on the participant's head, and participants performed a practice block of  
241 the behavioral task (see below). Subsequently, the experimental tasks began 45  
242 minutes after ingestion of the capsule to coincide with peak plasma levels of levodopa  
243 (Olanow et al., 2000). We measured heart rate, blood pressure, and subjective  
244 alertness immediately prior to ingestion of placebo or levodopa and again at the end of  
245 each session. Alertness was assessed using the Bond-Lader visual analog scale (Bond  
246 & Lader, 1974).

247

248 *Overview of behavioral tasks:* Each participant underwent the same experimental tasks  
249 in both sessions. Participants made reaching movements toward a visual target and  
250 received visual feedback pertaining to reach angle only at movement end point (figure  
251 1). Neural responses to feedback were recorded using EEG. Participants were  
252 instructed that each reach terminating within the target would be rewarded with a small  
253 monetary bonus. Participants first performed a block of 50 practice trials. The  
254 subsequent behavioral procedure consisted of two blocks of a reward learning task and  
255 two blocks of a visuomotor rotation (VMR) task. The order of the blocks alternated  
256 between the two task types but was otherwise randomized. Participants took self-paced  
257 rests between blocks.



258  
259 In the VMR task, a cursor appeared at movement end point to represent the position of  
260 the hand (Figure 1d). In unperturbed trials, the cursor was displayed directly over the  
261 occluded robot handle. In randomly selected trials, the cursor's position was decoupled  
262 from the robot handle position such that the cursor indicated a reach endpoint position  
263 that was rotated (about the start position) relative to the actual reach endpoint position.  
264 This was intended to produce sensory prediction error and trial-by-trial compensatory  
265 changes in reach angle opposite the direction of the rotations. The rotations were small  
266 relative to the size of the target, such that participants nearly always landed in the  
267 target, fulfilling the goal of the task and earning a monetary reward (the cursor feedback  
268 was within the target on 95.5% of trials, SD: 2%). Thus, reward and task error were  
269 constant between perturbed and unperturbed feedback, and by comparing the two  
270 conditions we could isolate the neural correlates of sensory error processing.

271  
272 In the reward learning task, no cursor appeared to indicate the position of the hand.  
273 Instead, binary feedback represented whether or not participants succeeded in hitting  
274 the target (Figure 1c). This allowed us to assess reward-based learning in isolation from  
275 sensory error processing, as visual information revealing the position of the hand was  
276 not provided. In separate blocks, reward feedback was tailored to produce adaptation  
277 towards increasingly clockwise and counterclockwise reach angles. Reward was  
278 delivered when the difference between the current reach angle and the median of the  
279 previous 10 reach angles was in the direction of intended learning. We compared the  
280 neural responses to reward and non-reward feedback to assess the neural correlates of  
281 reward processing during adaptation.

## 282 283 ***Apparatus/Behavioral Task***

284  
285 Participants produced reaching movements with their right arm while holding the handle  
286 of a robotic arm (InMotion2; Interactive Motion Technologies; figure 1). Position of the  
287 robot handle was sampled at 600 Hz. A semi-silvered mirror obscured vision of the arm  
288 and displayed visual information related to the task. An air sled supported each  
289 participant's right arm. Participants reached towards a white circular target 14 cm away  
290 from a circular start position in front of their chest. The start position turned from red to  
291 green to cue the onset of each reach once the handle had remained inside it  
292 continuously for 750 ms. Participants were instructed that they must wait for the cue to  
293 begin each reach but that it was not necessary to react quickly upon seeing the cue.  
294 Participants were instructed to make forward reaches and to stop their hand within the  
295 target. An arc-shaped cursor indicated reach extent throughout each movement without  
296 revealing reach angle. In only the first five baseline trials of each block, an additional  
297 circular cursor continuously indicated the position of the hand throughout the reach. A  
298 viscous force field assisted participants in braking their hand when the reach extent was  
299 14 cm. The robot ended each movement by fixing the handle position when the hand  
300 velocity decreased below 0.03 m/s. The hand was fixed in place for 700 ms, during  
301 which time visual feedback of reach angle was provided. Feedback indicated either  
302 reach end point position, a binary reward outcome, or feedback of movement speed  
303 (see below). Visual feedback was then removed, and the robot guided the hand back to

304 the start position. Reach end point was defined as the position at which the reach path  
305 intersected the perimeter of a circle (14-cm radius) centered at the start position. Reach  
306 angle was calculated as the angle between vectors defined by reach end point and the  
307 center of the target, each relative to the start position, such that reaching straight ahead  
308 corresponds to 0° and counterclockwise reach angles are positive.

309  
310 Feedback about reach angle was provided either in the form of end-point position  
311 feedback or binary reward feedback. The type of feedback, as well as various feedback  
312 manipulations, varied according to the assigned experimental block type (see Reward  
313 Learning Task and Visuomotor Rotation Task). Participants were told that they would  
314 earn additional monetary compensation for reaches that ended within the target, up to a  
315 maximum of \$10 CAD. Movement duration was defined as the time elapsed between  
316 the hand leaving the start position and the moment hand velocity dropped below 0.03  
317 m/s. If movement duration was >700 ms or <450 ms, no feedback pertaining to  
318 movement angle was provided. Instead, a gray arc behind the target turned blue or  
319 yellow to indicate that the reach was too slow or too fast, respectively. Participants were  
320 informed that movements with an incorrect speed would be repeated but would not  
321 otherwise affect the experiment. To minimize the impact of eyeblink-related EEG  
322 artifacts, participants were asked to fixate their gaze on a black circular target in the  
323 center of the reach target and to refrain from blinking throughout each arm movement  
324 and subsequent presentation of feedback.

325  
326 *Practice block:* Each participant first completed a block of practice trials that continued  
327 until they achieved 50 movements within the desired range of movement duration.  
328 Continuous position feedback was provided during the first 5 trials, and only end-point  
329 position feedback was provided for the following 10 trials. Subsequently, no position  
330 feedback was provided outside the start position.

331  
332 *Reward Learning task:* Binary reward feedback was provided to induce adaptation of  
333 reach angle (figure 1c). Each session included two blocks in the reward learning  
334 condition. The direction of intended learning was clockwise in one block and  
335 counterclockwise in the other. Each block continued until the participant completed 125  
336 reaches with acceptable movement duration. Participants reached toward a circular  
337 target 1.2 cm in diameter. The first 11 reaches were baseline trials during which  
338 continuous position feedback was provided during the first 5 trials, followed by 6 trials  
339 with only end-point cursor feedback. After these baseline trials no cursor feedback was  
340 provided, and binary reward feedback was instead provided at the end of the  
341 movement. Target hits and misses were indicated by the target turning green and red,  
342 respectively. Unbeknownst to participants, reward feedback did not necessarily  
343 correspond to the visual target. Instead, reward was delivered if the difference between  
344 the current reach angle and the median angle of the previous 10 reaches was in the  
345 direction of intended learning. When the running median was at least 6° away from zero  
346 in the direction of intended learning, reward was delivered at a fixed probability of 50%.  
347 This was intended to minimize conscious awareness of the manipulation by limiting  
348 adaptation to 6°. Reward was never delivered when the absolute value of the reach



349 angle was greater than  $10^\circ$ , for the same reason. We employed this adaptive, closed-  
350 loop reward schedule so that the overall frequency of reward was controlled.  
351 *Visuomotor rotation task:* End-point feedback was rotated relative to the actual reach  
352 angle to induce sensory error-based adaptation (figure 1d). Each session included two  
353 blocks in the VMR condition. Each block continued until participants completed 124  
354 reaches within acceptable movement duration limits. Participants reached toward a  
355 circular target 3.5 cm in diameter. Participants first performed baseline reaches during  
356 which cursor feedback reflected veridical reach angle continuously for the first 5 trials  
357 and only at movement end point for the subsequent 5 trials. After the baseline reaches  
358 the adaptation portion of each block began, unannounced to participants. During the  
359 adaptation trials, end-point position feedback was provided indicating a reach angle that  
360 was rotated relative to the true reach angle. There were 114 total adaptation trials (38  
361 with  $0^\circ$  rotation, and 19 each with  $\pm 2^\circ$  and  $\pm 4^\circ$  rotations). Participants were instructed  
362 that end-point feedback within the target would earn them bonus compensation, but no  
363 explicit reward feedback was provided.

364

### 365 **EEG data acquisition**

366

367 EEG data were acquired from 16 cap-mounted electrodes with an active electrode  
368 system (g.GAMMA; g.tec Medical Engineering) and amplifier (g.USBamp; g.tec Medical  
369 Engineering). We recorded from electrodes placed according to the 10-20 System at  
370 sites Fp1, Fp2, F3, F4, F7, F8, FT9, FT10, FCz, Cz, C3, C4, CPz, CP3, CP4, and Pz  
371 referenced to an electrode placed on participants' left earlobe. Impedances were  
372 maintained below 5 k $\Omega$ . Data were sampled at 4,800 Hz and filtered online with band-  
373 pass (0.1–1,000 Hz) and notch (60 Hz) filters. A photodiode attached to the display  
374 monitor was used to synchronize recordings to stimulus onset.

375

### 376 **Behavioral data analysis**

377

378 *Reward learning task.* As in our previous work using a similar task, we computed  
379 learning scores in each drug condition by subtracting the average reach angle in the  
380 clockwise condition from the average reach angle in the counterclockwise condition  
381 (Palidis et al., 2019). As such, positive scores indicate learning. We excluded baseline  
382 trials and trials that did not meet the movement duration criteria, as no feedback related  
383 to reach angle was provided on these trials. Each block continued until 114 trials after  
384 the baseline period met the movement duration criteria, so equal numbers of trials were  
385 analyzed for each participant. We tested for the presence of learning by submitting  
386 learning scores to 1-sample T-Tests against zero, and we compared learning scores in  
387 the placebo and levodopa conditions using paired T-Tests.

388

389 We also analyzed trial-by-trial variability in reach angle in response to reinforcement  
390 feedback using an approach similar to Pekny et al. (2015). First, we calculated trial-by-  
391 trial changes in reach angle as in Eq. 1:

392

393

394

395  $\Delta\theta_i = \theta_{i+1} - \theta_i$  (1)

396  
397 We then multiplied  $\Delta\theta_i$  by -1 for trials in the clockwise learning condition, so that positive  
398 values for  $\Delta\theta_i$  corresponded to changes in reach angle in the direction of intended  
399 learning, and any biases in  $\Delta\theta$  related to the direction of intended learning would have  
400 the same sign in the CW and CCW learning conditions. Next, we conditioned  $\Delta\theta_i$  on the  
401 reinforcement outcome of trial  $i$  and the drug condition to obtain trial-by-trial changes in  
402 reach angle following reward and non-reward after both placebo and levodopa  
403 administration. Next, we quantified trial by trial variability in each condition as the natural  
404 logarithm of the sample variance of  $\Delta\theta_i$ . Our dependent variable is an estimate of  
405 variance. This estimate of variance itself has variance due to sampling. For a normal  
406 distribution, the variance of a sample variance is proportional to the square of the true  
407 population variance. A log transformation is appropriate for linear modeling when the  
408 variance of the dependent measure is proportional to the square of its expectation  
409 (Montgomery et al., 2021).

410  
411 We then performed 2x2 repeated measures ANOVA on  $\text{Log}(\text{var}(\Delta\theta_i))$ . The factors were  
412 drug (levels: placebo, levodopa), and reward outcome on trial  $i$  (levels: non-reward,  
413 reward).

414  
415 *Visuomotor rotation task.* To quantify trial-by-trial learning we first calculated the change  
416 in reach angle between successive trials, as in *Eq. 1*. We then performed a linear  
417 regression on  $\Delta\theta_i$  with the rotation imposed on trial  $i$  as the predictor variable. The  
418 rotation was  $0^\circ$ ,  $\pm 2^\circ$ , or  $\pm 4^\circ$ . This regression was performed on an individual participant  
419 basis, separately for placebo and levodopa conditions. We excluded trials that did not  
420 meet the duration criteria as no visual feedback was provided on these trials. We took  
421 the resulting slope estimates multiplied by -1 as a metric of learning rate, as it reflects  
422 the portion of visual errors that participants corrected with a trial-by-trial adaptive  
423 process. We tested for the presence of adaptation in each condition by submitting  
424 learning rates to 1-sample t-tests against zero. We tested for an effect of levodopa vs  
425 placebo on learning rates using a paired t-test.

## 426 427 **EEG preprocessing**

428  
429 EEG data were resampled to 480 Hz and filtered off-line between 0.1 and 35 Hz with a  
430 second-order Butterworth filter. Continuous data were segmented into 2-s epochs time-  
431 locked to feedback stimulus onset at 0 ms (time range: -500 to +1,500 ms). Epochs  
432 flagged for containing artifacts as well as any channels with bad recordings were  
433 removed after visual inspection. One participant was excluded entirely from the EEG  
434 analysis due to excessive muscle artifacts. Subsequently, extended infomax  
435 independent component analysis was performed on each participant's data (Delorme &  
436 Makeig, 2004). Components reflecting eye movements and blink artifacts were  
437 identified by visual inspection and subtracted by projection of the remaining components  
438 back to the voltage time series.

439  
440

## 441 **EEG data analysis**

442  
443 After artifact removal, we computed ERPs by trial averaging EEG time series epochs for  
444 various feedback conditions described in the sections below. ERPs were computed on  
445 an individual participant basis separately for recordings from channels FCz and Pz. We  
446 selected FCz and Pz a priori because these electrodes typically correspond to the  
447 peaks of the scalp distributions for the feedback related negativity/reward positivity and  
448 the P300 ERP components, respectively. We found this to be true in a previous  
449 experiment using a very similar paradigm (Palidis et al., 2019). All ERPs were baseline  
450 corrected by subtracting the average voltage in the 75-ms period immediately following  
451 stimulus onset. We used a baseline period following stimulus onset because stimuli  
452 were presented immediately upon movement termination and the period before stimulus  
453 presentation was more likely to be affected by movement related artifacts. Trials in  
454 which reaches did not meet the movement duration criteria were excluded, as feedback  
455 relevant to reach adaptation was not provided on these trials. Finally, ERPs were low-  
456 pass filtered with a cutoff frequency of 30 Hz.

457  
458 We computed ERPs separately following administration of placebo and levodopa. In the  
459 reward learning task, we computed ERPs separately for feedback indicating non-reward  
460 (placebo:  $107.2 \pm 9.7$  trials, levodopa:  $104.0 \pm 8.3$  trials) and feedback indicating reward  
461 (placebo:  $118.4 \pm 9.6$  trials, levodopa:  $118.0 \pm 8.1$  trials). In the visuomotor rotation task,  
462 we computed ERPs separately for veridical endpoint feedback (placebo:  $72.6 \pm 3.5$   
463 trials, levodopa:  $72.9 \pm 3.1$  trials),  $\pm 2^\circ$  rotated feedback (placebo:  $70.8 \pm 5.2$  trials,  
464 levodopa:  $72.1 \pm 3.8$  trials), and  $\pm 4^\circ$  rotated feedback (placebo:  $64.5 \pm 4.7$  trials,  
465 levodopa:  $66.3 \pm 4.1$  trials). We excluded trials in which the cursor did not land within  
466 the target.

467  
468 We selected time windows of interest for ERP analysis using independent data from a  
469 previous experiment with very similar procedures (Palidis et al., 2019). We analyzed the  
470 amplitudes of FRN/RP and P300 components within 50 ms time windows centered  
471 around the latencies of the FRN/RP and P300 peaks observed in our previous study.  
472 The FRN/RP peak was taken as the maximum value of the difference between ERPs  
473 elicited by reward and non-reward feedback recorded from electrode FCz (latency:  
474 292ms). For completeness, we used the same time window to test for FRN/RP effects  
475 in the visuomotor rotation task of the current study although we did not observe an  
476 FRN/RP component in our previous visuomotor rotation task. The P300 peak latencies  
477 were determined separately for reward and non-reward feedback as the times of  
478 maximal amplitude of ERPs recorded from electrode Pz (reward: 319ms, non-reward:  
479 371ms). The peak latencies selected for the FRN/RP and P300 components in the  
480 reward learning task corresponded very closely to the peaks observed in the current  
481 data. However, the P300 peak in the visuomotor rotation task of the current study was  
482 earlier than that in our previous experiment. This difference in latency may be due to  
483 changes in the nature of the feedback. Thus, we determined the latency of the P300  
484 peak in the visuomotor rotation task of the current study using a data-driven method that  
485 does not bias comparisons between conditions (Brooks et al., 2017). We aggregated all  
486 trials across conditions and participants and computed a trial averaged ERP using

487 recordings from electrode Pz. The P300 peak was determined as the maximal  
488 amplitude of this averaged waveform (latency: 317ms). This method is only suitable for  
489 comparing waveforms of different amplitude but similar morphology across conditions,  
490 and thus could not be applied to the ERPs in the reward learning task (Brooks et al.,  
491 2017).

492  
493 We tested for effects of feedback manipulations on FRN/RP components using the  
494 average amplitude of ERPs recorded from electrode FCz within the FRN/RP time  
495 window. We tested for effects on P300 ERP components using average amplitude of  
496 ERPs recorded from electrode Pz within the P300 time window corresponding to a  
497 given condition. For the reward learning task, we used 2x2 repeated measures  
498 ANOVAs with factors drug (levels: placebo, levodopa) and reinforcement outcome  
499 (levels: reward, non-reward). For the visuomotor rotation task, we used 2x3 repeated  
500 measures ANOVAs with factors drug (levels: placebo, Levodopa), and rotation (levels:  
501 0°, ±2°, ±4°).

## 502 503 **Experiment 2**

### 504 505 ***Participants***

506  
507 A total of 38 participants were included in experiment 2 (Table 2). All participants were  
508 screened for neurological and psychiatric illness, history of drug or alcohol abuse, and  
509 contraindications for levodopa. Participants provided written informed consent to  
510 experimental procedures approved by the Research Ethics Board at Western  
511 University.

### 512 513 ***Procedure***

514  
515 *Drug administration:* Participants were administered either levodopa or placebo in a  
516 randomized double-blind design. A capsule was ingested that contained 100 mg of  
517 levodopa (L-3,4-dihydroxyphenylalanine) and 25 mg of carbidopa or an equal volume of  
518 placebo. The experimental tasks began 45 minutes after ingestion of the capsule to  
519 coincide with peak plasma levels of levodopa. We measured subjective alertness using  
520 the Bond-Lader visual analog scale (Bond & Lader, 1974) as well as heart rate and  
521 blood pressure immediately prior to ingesting the capsule and again at the end of each  
522 session.

523  
524 *Force field adaptation task:* Participants produced reaching movements with their right  
525 arm while holding the handle of a robotic arm (InMotion2; Interactive Motion  
526 Technologies). The position of the robot handle was sampled at 600 Hz. A semi-silvered  
527 mirror obscured vision of the arm and displayed visual information related to the task.  
528 An air sled supported each participant's right arm.

529  
530 On each trial, participants reached from a central home position (blue circle 20 mm in  
531 diameter) to one of 8 circular targets (24 mm in diameter) arranged around the home  
532 position at a distance of 10 cm. The target angles were 0°, 45°, 90°, 135°, 180°, 225°, 270°.

533 270°, and 315°. A 5-mm pink circular cursor represented the position of the robot  
534 handle. When the cursor reached the target on each trial, the target either turned blue to  
535 indicate that the movement duration was satisfactory ( $375 \pm 100$  ms), green to indicate  
536 that the movement was too slow, or red to indicate that the movement was too fast. The  
537 subject moved the robot handle back to the home position at the end of each reach.  
538

539 In null field blocks, the robot motors did not apply any external forces to the hand. In  
540 force field blocks, the robot applied forces to the hand that were perpendicular to the  
541 direction of movement and proportional to the velocity of the hand (eq. 2). The direction  
542 of the force field was either clockwise or counterclockwise, in separate blocks.  
543

$$544 \begin{bmatrix} F_x \\ F_y \end{bmatrix} = b \begin{bmatrix} 0 & d \\ -d & 0 \end{bmatrix} \begin{bmatrix} v_x \\ v_y \end{bmatrix} \quad (2)$$

545  
546  $x$  and  $y$  correspond to the lateral and sagittal directions.  $F_x$  and  $F_y$  describe the forces  
547 applied to the hand,  $v_x$  and  $v_y$  describe the velocity of the hand,  $b$  is the field constant,  
548 and  $d$  corresponds to the direction ( $d = 1$  for a clockwise force field (CWFF),  $-1$  for a  
549 counterclockwise force field (CCWFF) or  $0$  for a null field (NF)).  
550

551 All participants completed five blocks of 96 trials. Each block consisted of 12 reaches to  
552 each of the 8 targets presented in random order. The five blocks occurred in the  
553 following order: NFa (null field), FF1a (CWFF), NFb (null field), FF1b (CWFF), FF2  
554 (CCWFF). Trials 6, 24, 35, 50, 71, and 91 of each block were “catch trials”, during which  
555 reaches occurred in a null field. When the force field is suddenly removed in catch trials,  
556 errors occur in the opposite direction of the force field. A reduction in reach error during  
557 force field trials may reflect either adaptation to the force field, stiffening of the arm, or  
558 changes in feedback corrections. The magnitude of errors opposite the force field in  
559 catch trials is thought to better capture adaptation of feedforward control. Similar to  
560 catch trials, we expected after-effects at the beginning of NFa in the form of  
561 counterclockwise reach errors after the sudden removal of the clockwise force field in  
562 FF1a.  
563

## 564 **Data analysis**

565  
566 Robot handle positional data were low-pass filtered with a 40 Hz cutoff frequency and  
567 differentiated to yield instantaneous velocity and acceleration. On each trial, movement  
568 onset and end of movement were defined according to a velocity threshold set at 5% of  
569 the maximum tangential velocity of the robot endpoint. Our behavioral measure of  
570 interest was the lateral deviation of the hand at the time of peak tangential velocity.  
571 Perpendicular deviation (PD) was calculated relative to a line drawn from the position of  
572 movement onset in the direction of the target angle (either 0°, 45°, 90°, 135°, 180°,  
573 225°, 270°, or 315°). PD was calculated for each trial as the perpendicular distance  
574 between the position of the hand at peak velocity and this line, with positive PD  
575 corresponding to clockwise deviations. For non-catch trials, PD was averaged across  
576 trials within 12 bins of 8 trials each. We analyzed effects related to adaptation



577 separately for an early and late period of each block. The early period consisted of the  
578 first 5 bins (trials 1-40, catch trials: 6,24,35) and the late period consisted of the  
579 remaining 7 bins (trials 41-96, catch trials: 50,71,91). Baseline PD was computed as the  
580 average PD in the late period of NFa. We computed metrics for adaptation, savings,  
581 after-effects, and learning with interference separately for the early and late periods,  
582 and separately for catch trials and non-catch trials. All metrics were computed so that  
583 positive values corresponded to the effects of interest, and values of zero correspond to  
584 no effect. We tested for adaptation, savings, after-effects, and learning with interference  
585 using 1-sample t-tests against zero. We tested for differences between the placebo and  
586 levodopa groups using paired t-tests.

587 *Non-catch trials:* Adaptation metrics were computed to capture reductions in error  
588 during FF1a relative to the initial errors caused by the onset of the force field. Our  
589 measure of early adaptation was the average PD in the first bin of FF1a minus the  
590 average PD across subsequent bins within the early period of FF1a (bins 2-5). Our  
591 measure of late adaptation was the average PD in the first bin of FF1a minus the  
592 average PD across bins in the late period of FF1a (bins 6-12). Savings metrics were  
593 computed to measure reductions in errors during the second exposure to FF1  
594 compared to the first. Savings was measured as the difference in PD between FF1a  
595 and FF1b (FF1a – FF1b), separately for PD averaged across bins within the early and  
596 late periods. Adaptation to FF1a caused after-effects in the form of errors upon its  
597 sudden removal at the onset of NFb. After-effects were measured as the difference  
598 between baseline PD and the PD in NFb (baseline – NFb), separately for PD averaged  
599 across bins in the early and late periods of NFb. We expected large initial errors at the  
600 onset of FF2 due to a combination of after-effects from the removal of FF1b and the  
601 introduction of a novel force field. Previous adaptation to FF1b was also expected to  
602 cause anterograde interference during adaptation to FF2 as the force fields were  
603 opposite. Metrics for adaptation with interference were computed to capture reductions  
604 in errors during FF2 relative to the initial errors caused by the onset of the force field.  
605 Early adaptation with interference was measured by subtracting the average PD from  
606 the first bin of FF2 from the average PD across subsequent bins within the early period  
607 of FF2 (bins 2-5). Late adaptation with interference was measured by subtracting the  
608 average PD in the first bin of FF2 from the average PD across subsequent bins in the  
609 late period of FF2 (bins 6-12).

610 *Catch trials:* When a force field is suddenly removed during catch trials, adaptation to  
611 the force field is reflected in errors opposite the direction of the force field. Adaptation  
612 effects were computed as the baseline PD minus the PD in FF1a averaged across  
613 catch trials, separately for catch trials in the early and late period. Improved adaptation  
614 due to savings was expected to cause larger errors in catch trial during FF1b compared  
615 to FF1a. Savings was computed as the PD in FF1a minus the PD in FF1b, averaged  
616 across catch trials separately for the early and late periods. Learning effects with  
617 interference were computed using data from FF2. There was no suitable baseline PD to  
618 analyze learning in this block. Instead, the PD of the first catch trial was subtracted from  
619 the PD of each of the later catch trials, separately for catch trials in the early and late  
620 periods. This captures changes in catch trial PD opposite the direction of FF2 due to  
621 adaptation.

622

## 623 **Statistics**

624

625 Statistical tests were implemented using JASP v0.14.1. We compared sample means  
626 using 1 sample T-Tests, paired sample T-Tests, or independent sample T-Tests. These  
627 comparisons allowed us to compute one-tailed Bayes factors representing  
628  $p(\text{data}|H_+) / p(\text{data}|H_0)$ , where  $H_0$  represents the null hypothesis corresponding to the  
629 standard  $t$ -distribution for an effect size of 0, and  $H_+$  represents the alternative  
630 hypothesis corresponding to a  $t$ -distribution constructed using a one-tailed prior  
631 distribution of effect sizes. The use of 1-tailed priors is recommended in the case of  
632 directional hypotheses to provide “a fairer balance between the ability to provide  
633 evidence for  $H_0$  and  $H_1$ ” (Keysers et al., 2020). We used the default effect size priors  
634 implemented in JASP (Cauchy scale 0.707). These priors are generally appropriate for  
635 effect sizes typical of neuroscience research, and the use of default priors is  
636 recommended for standardized and objective analysis (Keysers et al., 2020; Rouder et  
637 al., 2012; Wetzels et al., 2011). Bayesian estimates of effect size are reported as  
638 median posterior Cohen’s  $d$  with 95% credibility interval using 2-tailed priors for  $H_1$  to  
639 avoid biasing the estimate in the expected direction. We also report T-statistics, p-  
640 values, and 95% confidence intervals generated using 2-tailed frequentist T-Tests. For  
641 factorial analyses, we conducted frequentist and Bayesian repeated measures ANOVAs  
642 using JASP with default priors. Bayes factors were computed for the inclusion of each  
643 effect as the ratio of the data likelihood under the model containing that effect vs  
644 equivalent models stripped of that effect. Bayes factors  $>3$  and  $>10$  were taken as  
645 moderate and strong evidence in favor of the alternative hypothesis, respectively. Bayes  
646 factors  $<1/3$  and  $<1/10$  were taken as moderate and strong evidence in favor of the null  
647 hypothesis, respectively. Bayes factors between  $1/3$  and  $3$  were taken as inconclusive  
648 evidence (Keysers et al., 2020).

649

650 Directional priors used for alternative hypotheses specified our predictions that learning  
651 metrics would be greater than zero (Reward learning score, VMR learning rate, force  
652 field adaptation, savings, after-effects, and adaptation with interference). In comparing  
653 placebo and levodopa conditions, our alternative hypotheses specified that learning  
654 metrics would be lower in levodopa conditions than placebo conditions, in accordance  
655 with the “dopamine overdose” hypothesis. The only exception was that we predicted  
656 adaptation with interference would be increased by levodopa. If anterograde  
657 interference is caused by dopaminergic reinforcement learning, then the “dopamine  
658 overdose” effect should reduce interference and facilitate adaptation. All other Bayes  
659 factors are computed with 2-tailed priors, as they were conducted without directional a  
660 priori hypotheses (control measures, etc.).

661

## 662 **Results**

663

### 664 **Experiment 1**

665

666 *Control measures:* Participants’ judgments at the end of the second session as to  
667 whether they received placebo or drug were correct at near chance level (47.62%).

668 Table 1 shows the values for heart rate, blood pressure, and alertness recorded at the  
669 beginning and end of each experimental session for both the placebo and levodopa  
670 conditions. We computed the percent change in heart rate and blood pressure recorded  
671 at the beginning and end of each session. There were no reliable differences between  
672 the levodopa and placebo conditions in the percent change of heart rate ( $t(18) = 0.70$ ,  
673  $p=0.49$ , 95%CI for difference = [-0.03 0.07], BF = 0.30, posterior  $\delta$ : median = 0.139,  
674 95%CI = [-0.278 0.565]), systolic blood pressure ( $t(18) = -0.39$ ,  $p=0.70$ , 95%CI for  
675 difference = [-0.06 0.04], BF = 0.25, posterior  $\delta$ : median = -0.077, 95%CI = [-0.498  
676 0.338]), or diastolic blood pressure ( $t(18) = -0.88$ ,  $p=0.39$ , 95%CI for difference = [-0.07  
677 0.03], BF = 0.33, posterior  $\delta$ : median = -0.173, 95%CI = [-0.603 0.245]). We did observe  
678 a significant difference between levodopa and placebo in the percent change of  
679 alertness ( $t(20) = 2.46$ ,  $p=0.023$ , 95%CI for difference = [0.02 0.19], BF = 2.53, posterior  
680  $\delta$ : median = 0.477, 95%CI = [0.044 0.930]). However, this effect was likely due to  
681 chance as alertness was only different between the two drug conditions at the time point  
682 pre-administration of the capsule ( $t(20) = 2.18$ ,  $p=0.042$ ), but not post-administration  
683 ( $t(20) = -0.068$ ,  $p=0.95$ ). We also tested for effects of levodopa on the median response  
684 time (the latency between the go cue and the robot handle leaving the home position),  
685 and the median movement time (table 1). We observed no reliable differences in  
686 response time between the placebo and levodopa conditions in either the reward  
687 learning task ( $t(20)=0.72$ ,  $p=0.48$ , 95%CI for difference = [-37.49 77.34], BF = 0.29,  
688 posterior  $\delta$ : median = 0.137, 95%CI = [-0.261 0.545]), or the VMR task ( $t(20)=0.62$ ,  
689  $p=0.54$ , 95%CI for difference = [-33.91 62.56], BF = 0.27, posterior  $\delta$ : median = 0.118,  
690 95%CI = [-0.280 0.523]). We also observed no reliable difference in movement time  
691 between the placebo and levodopa conditions in either the reward learning task ( $t(20)=-$   
692 0.11,  $p=0.91$ , 95%CI for difference = [-20.75 18.69], BF = 0.23, posterior  $\delta$ : median = -  
693 0.021, 95%CI = [-0.420 0.377]), or the VMR task ( $t(20)=-0.21$ ,  $p=0.84$ , 95%CI for  
694 difference = [-16.21 13.27], BF = 0.23, posterior  $\delta$ : median = -0.039, 95%CI = [-0.44  
695 0.358]).

## 696 **Behavioral results**

697 *Reward learning task.* Behavioral data from the reward learning task are shown in  
698 Figure 2. Learning scores were reliably greater than zero in both the placebo condition  
699 (mean = 6.03, SD = 3.58,  $t(20) = 7.72$ ,  $p = 2.02e-7$ , 95%CI = [4.40 7.66], BF = 1.56e5,  
700 posterior  $\delta$ : median = 1.58 95%CI = [0.92 2.28]), and the levodopa condition (mean =  
701 6.93, SD = 3.86,  $t(20) = 8.23$ ,  $p = 7.49e-8$ , 95%CI = [5.17 8.69], BF = 3.9e5, posterior  $\delta$ :  
702 median = 1.69, 95%CI = [1.00 2.41]) conditions. Learning scores were slightly higher in  
703 the levodopa condition, though this difference was not statistically reliable. This result  
704 provided strong evidence against our hypothesis of reduced learning in the levodopa  
705 group ( $t(20) = -1.58$ ,  $p = 0.13$ , 95%CI for difference = [-2.09 0.29], BF = 0.10, posterior  
706  $\delta$ : median = -0.30, 95%CI = [-0.73 0.11]). We observed similar evidence against the  
707 hypothesized effect of levodopa when learning scores were computed using only the  
708 final 20 trials in each block ( $t(20) = -1.60$ ,  $p = 0.13$ , 95%CI for difference = [-3.05 0.40],  
709 BF = 0.10, posterior  $\delta$ : median = -0.31, 95%CI = [-0.73 0.10]).

710  
711  
712

713 The variability of trial-by-trial changes in reach angle following reward and non-reward  
714 outcomes is shown in Figure 3. We found a reliable main effect of reinforcement  
715 outcome on the log transformed variance of trial-by-trial changes in reach angle ( $F(1,20)$   
716  $= 74.84$ ,  $p = 3.41e-8$ ,  $\eta_p^2 = 0.79$ ,  $BF = 3.02e14$ ). This indicates an increase in trial-by-trial  
717 variance of reach angle following non-reward outcomes relative to reward. We found  
718 moderate evidence against effects of drug condition ( $F(1,20) = 0.0072$ ,  $p = 0.93$ ,  $\eta_p^2 =$   
719  $3.86e-4$ ,  $BF = 0.22$ ) and reward by drug interaction ( $F(1,20) = 0.0478$ ,  $p =$   
720  $0.829$ ,  $\eta_p^2 = 2.38e-3$ ,  $BF = 0.30$ ).

721  
722 *Visuomotor rotation task.* Mean trial-by-trial changes in reach angle after the different  
723 feedback rotations are shown in Figure 4. Learning rates were reliably greater than zero  
724 following administration of both placebo (mean: 0.313, SD: 0.133,  $t(20) = 10.77$ ,  $p =$   
725  $8.93e-10$ , 95%CI = [0.25 0.37],  $BF = 2.4e7$ , posterior  $\delta$ : median = 2.22, 95%CI = [1.40  
726 3.10]) and levodopa (mean: 0.294, SD: 0.102,  $t(20) = 13.18$ ,  $p = 2.54e-11$ , 95%CI =  
727 [0.25 0.34],  $BF = 6.75e8$ ). Learning rates were not reliably different in the two  
728 conditions ( $t(20) = 0.703$ ,  $p = 0.491$ , 95%CI for difference = [-0.04 0.07],  $BF = 0.42$ ,  
729 posterior  $\delta$ : median = 0.134, 95%CI = [-0.265 0.540]).

730

731

## 732 **Event-related potential results**

733

734 *Reward learning task.*

735

736 Feedback-related negativity/Reward positivity: Event-related potentials (ERPs) elicited  
737 by reinforcement feedback at electrode FCz are shown in Figure 5a. We analyzed the  
738 FRN/RP by submitting the average ERP amplitude at electrode FCz between 267-  
739 317ms to frequentist and bayesian repeated measures ANOVAs (figure 5b). We found a  
740 reliable main effect of reward outcome on FRN/RP amplitude ( $F(1,19) = 42.25$ ,  $p =$   
741  $3.16e-6$ ,  $\eta_p^2 = 0.69$ ,  $BF = 8.89e8$ ). We observed moderate evidence both against an effect  
742 of drug ( $F(1,19) = 0.13$ ,  $p = 0.73$ ,  $\eta_p^2 = 6.56e-3$ ,  $BF = 0.24$ ) and a reward by drug  
743 interaction ( $F(1,19) = 0.2$ ,  $p = 0.66$ ,  $\eta_p^2 = 0.01$ ,  $BF = 0.30$ ) on FRN/RP amplitude.

744

745 P300: ERPs elicited by reinforcement feedback at electrode Pz are shown in Figure 5c.  
746 We analyzed the P300 by submitting the average ERP amplitudes at electrode Pz  
747 during the P300 time windows (Reward: 294-344ms, Non-reward: 346-396ms) to  
748 frequentist and bayesian repeated measures ANOVAs (figure 5d). We found a reliable  
749 main effect of reward outcome on P300 amplitude ( $F(1,19) = 35.83$ ,  $p = 9.26e-6$ ,  
750  $\eta_p^2 = 0.65$ ,  $BF = 3.5e5$ ). We observed moderate evidence both against an effect of drug  
751 ( $F(1,19) = 0.20$ ,  $p = 0.66$ ,  $\eta_p^2 = 0.01$ ,  $BF = 0.26$ ) and against a reward by drug interaction  
752 ( $F(1,19) = 0.13$ ,  $p = 0.73$ ,  $\eta_p^2 = 6.56e-3$ ,  $BF = 0.29$ ) on P300 amplitudes.

753

754 *Visuomotor rotation task.*

755

756 Feedback-related negativity/Reward positivity: ERPs elicited by endpoint cursor  
757 feedback at electrode FCz are shown in Figure 6a. We analyzed the FRN/RP by

758 submitting the average ERP amplitude at electrode FCz between 267-317ms to  
759 repeated measures ANOVAs (figure 6b). We did not find reliable main effects of drug  
760 ( $F(1,19) = 1.37$ ,  $p = 0.26$ ,  $\eta_p^2=0.07$ ), or feedback rotation ( $F(2,38) = 0.1$ ,  $p = 0.86$   
761 (Greenhouse-Geisser corrected),  $\eta_p^2= 5.12e-3$ ). We did observe a reliable drug by  
762 rotation interaction effect ( $F(2,38) = 4.75$ ,  $p = 0.02$  (Greenhouse-Geisser corrected),  $\eta_p^2=$   
763 0.2). Simple main effects did not show reliable main effects of rotation in either the  
764 placebo ( $F(2,38) = 2.17$ ,  $p=0.13$ ) or levodopa ( $F(2,38) = 2.06$ ,  $p=0.14$ ) conditions on  
765 FRN/RP amplitudes.

766  
767 P300: ERPs elicited by endpoint cursor feedback at electrode Pz are shown in Figure  
768 6c. We analyzed the P300 by submitting the average ERP amplitude at electrode Pz  
769 between 292-342 ms to repeated measures ANOVAs (figure 6d). We did not find  
770 reliable main effects of drug ( $F(1,19) = 0.43$ ,  $p = 0.52$ ,  $\eta_p^2=0.02$ ), or feedback rotation  
771 ( $F(2,38) = 1.31$ ,  $p = 0.28$  (Greenhouse-Geisser corrected),  $\eta_p^2= 0.06$ ). We did observe a  
772 reliable drug\*rotation interaction effect ( $F(2,38) = 7.46$ ,  $p = 2.24e-3$  (Greenhouse-  
773 Geisser corrected),  $\eta_p^2= 0.28$ ). Simple main effects revealed a reliable main effect of  
774 rotation in the placebo ( $F(2,38) = 5.72$ ,  $p=6.72e-3$ ) but not the levodopa ( $F(2,38) = 0.51$ ,  
775  $p=0.60$ ) condition on P300 amplitude.

## 776 777 **Experiment 2**

778  
779 *Control measures:* Participants' judgments as to whether they received placebo or drug  
780 was near chance level (52.63%) and only 13.16% of participants responded that they  
781 thought they had received the drug. The values for heart rate, blood pressure, and  
782 alertness are reported in Table 2 for both the placebo and levodopa groups at the  
783 beginning and end of each experimental session. There were no reliable differences  
784 between the levodopa and placebo conditions in the percent change of heart rate ( $t(36)$   
785  $= -1.09$ ,  $p=0.282$ , 95%CI for difference = [-0.10 0.03], BF = 0.5, posterior  $\delta$ : median = -  
786 0.273, 95%CI = [-0.875 0.284]), diastolic blood pressure ( $t(36) = 1.37$ ,  $p=0.18$ , 95%CI  
787 for difference = [-0.02 0.11], BF = 0.65, posterior  $\delta$ : median = 0.346, 95%CI = [-0.218  
788 0.960]), systolic blood pressure ( $t(36) = 1.37$ ,  $p=0.18$ , 95%CI for difference = [-.02 0.09],  
789 BF = 0.65, posterior  $\delta$ : median = 0.346, 95%CI = [-0.218 0.960]), or alertness ( $t(36) = -$   
790 0.88,  $p=0.39$ , 95%CI for difference = [-0.95 0.38], BF = 0.43, posterior  $\delta$ : median = -  
791 0.218, 95%CI = [-0.810 0.337]). There was also no reliable difference between peak  
792 movement velocity between the levodopa and placebo groups ( $t(36) = -0.09$ ,  $p=0.93$ ,  
793 95%CI for difference = [-0.01 9.94e-3], BF = 0.32, posterior  $\delta$ : median = -0.021, 95%CI  
794 = [-0.585 0.539] ).

## 795 796 **Force field adaptation results**

797  
798 In each trial, we measured the perpendicular deviation (PD) of the reach trajectory at  
799 peak tangential velocity. PD data from throughout each force field and null field block,  
800 excluding catch trials, are shown in Figure 7. PD data from catch trials are shown in  
801 Figure 8. We computed contrasts to test for adaptation, savings, after-effects, and  
802 learning with interference in both the early (bins 1-5) and late (bins 6-12) periods  
803 following perturbation onset (Figure 9). We tested whether these effects are different



804 from zero using 1-sample T-Tests for both the levodopa and placebo groups. We tested  
805 for differences between the levodopa and placebo groups using independent sample T-  
806 Tests. Detailed statistical results are shown in Table 3.

807

### 808 **Adaptation:**

809

810 *Non-catch trials:* Early adaptation was greater than zero in both the placebo ( $p=3.62e-9$ ,  
811  $BF=6.36e+6$ ) and levodopa conditions ( $p=6.61e-8$ ,  $BF=432848$ ). We also observed  
812 reliable late adaptation for both the placebo ( $p=2.48e-10$ ,  $BF=7.72e+7$ ) and levodopa  
813 ( $p=4.71e-9$ ,  $BF=4.99e+6$ ) conditions. We did not observe a reliable difference between  
814 drug conditions for either early ( $p=0.83$ ,  $BF=0.37$ ) or late ( $p=0.57$ ,  $BF=0.22$ ) adaptation.

815

816 *Catch trials:* Early adaptation was greater than zero in both the placebo ( $p=4.82e-8$ ,  
817  $BF=574167$ ) and levodopa ( $p=3.62e-8$ ,  $BF=755029$ ) conditions. We observed reliable  
818 late adaptation in both the placebo ( $p=2.92e-7$ ,  $BF=110522$ ) and levodopa ( $p=2.54e-11$ ,  
819  $BF=6.48e+8$ ) conditions. There was no reliable difference between drug conditions for  
820 either early ( $p=0.61$ ,  $BF=0.47$ ), or late ( $p=0.90$ ,  $BF=0.29$ ) adaptation.

821

### 822 **Savings:**

823

824 *Non-catch trials:* Our analyses yielded inconclusive evidence in favor of the  
825 hypothesized effect of savings for early adaptation for both the placebo ( $p=0.14$ ,  
826  $BF=1.23$ ) and levodopa ( $p=0.11$ ,  $BF=1.43$ ) conditions. In the late period of adaptation,  
827 Non-catch trials provided inconclusive evidence against the hypothesized effect of  
828 savings following placebo ( $p=0.50$ ,  $BF=0.44$ ), and moderate evidence against the  
829 hypothesized effect of savings following levodopa ( $p=0.70$ ,  $BF=0.18$ ). There was  
830 moderate evidence against the hypothesis that savings would be reduced by levodopa  
831 in early adaptation ( $p=0.87$ ,  $BF=0.28$ ), and inconclusive evidence that savings would be  
832 reduced in late adaptation ( $p=0.45$ ,  $BF=0.59$ ).

833

834 *Catch trials:* There was moderate evidence against the hypothesized effects of savings  
835 for early adaptation following both placebo ( $p=0.72$ ,  $BF=0.33$ ) and levodopa ( $p=0.75$ ,  
836  $BF=0.19$ ). Evidence for savings in late adaptation was inconclusive following both  
837 placebo ( $p=0.14$ ,  $BF=1.20$ ) and levodopa ( $p=0.33$ ,  $BF=0.60$ ). There was inconclusive  
838 evidence against the hypothesis that levodopa would reduce savings for both early  
839 ( $p=0.63$ ,  $BF=0.47$ ) and late ( $p=0.39$ ,  $BF=0.66$ ) adaptation.

840

### 841 **After-Effects:**

842

843 *Non-catch trials:* We observed reliable after-effects in the early portion of NFb following  
844 adaptation in both the placebo ( $p=4.00e-8$ ,  $BF=688519.55$ ) and levodopa ( $p=2.56e-9$ ,  
845  $BF=8.79e+6$ ) conditions. We also observed reliable after-effects extending to the later  
846 period of NFb after both placebo ( $p=1.37e-3$ ,  $BF=56.24$ ) and levodopa ( $p=9.66e-4$ ,  
847  $BF=76.15$ ). We observed no reliable evidence that levodopa impaired after-effects in  
848 either the early ( $p=0.99$ ,  $BF=0.32$ ) or late ( $p=0.78$ ,  $BF=0.39$ ) periods.

849

## 850 **Adaptation with interference:**

851  
852 *Non-catch trials:* Early adaptation following exposure to an opposing force field was  
853 reliably greater than zero in both the placebo ( $p=1.06e-9$ ,  $BF=2.00e+7$ ) and levodopa  
854 ( $p=3.42e-6$ ,  $BF=11657.42$ ) conditions. We also observed reliable late adaptation in both  
855 the placebo ( $p=5.98e-12$ ,  $BF=2.51e+9$ ) and levodopa ( $p=1.70e-9$ ,  $BF=1.28e+7$ )  
856 conditions. We observed moderate evidence against the hypothesized effect that  
857 levodopa would result in improved adaptation with interference in both the early  
858 ( $p=0.23$ ,  $BF=0.16$ ) and late ( $p=0.18$ ,  $BF=0.15$ ) periods.

859  
860 *Catch trials:* Early adaptation following exposure to an opposing force field was reliably  
861 greater than zero in both the placebo ( $p=6.37e-5$ ,  $BF=837.09$ ) and levodopa ( $p=4.84e-6$ ,  
862  $BF=8524.02$ ) conditions. We also observed reliable late adaptation in both the placebo  
863 ( $p=4.33e-7$ ,  $BF=77010.30$ ) and levodopa ( $p=4.20e-8$ ,  $BF=657919.38$ ) conditions. We  
864 observed inconclusive evidence against the hypothesis that levodopa would result in  
865 improved adaptation with interference in the early period ( $p=0.65$ ,  $BF=0.45$ ), and  
866 moderate evidence in the late period ( $p=0.77$ ,  $BF=0.26$ ).

867

## 868 **Discussion**

869

870 We tested for effects of levodopa, a dopamine precursor, in three different motor  
871 adaptation tasks across two experiments. In the first experiment we recorded EEG  
872 during a reward-based motor adaptation task and a sensory error-based visuomotor  
873 rotation (VMR) adaptation task. In the second experiment, we used a force field  
874 adaptation paradigm to test for effects of levodopa on initial adaptation, savings, and  
875 anterograde interference. We hypothesized that levodopa would selectively impair  
876 neural and behavioral responses to reinforcement feedback in the reward-based  
877 learning task as well as savings and interference. However, the only reliable influence of  
878 levodopa was in modulating the effect of visuomotor rotation on the P300 event-related  
879 potential component.

880

881 *Visuomotor rotation task:* During the VMR task included in experiment 1, a cursor  
882 appeared at the endpoint of each reach to represent the position of the hand, and this  
883 feedback was perturbed through random rotations. We observed robust trial-by-trial  
884 adaptation to these perturbations. We did not find evidence that adaptation was affected  
885 by levodopa. This was expected, as trial-by-trial error correction induced by relatively  
886 small visuomotor rotations is thought to be driven primarily by sensory error-based  
887 learning mechanisms as opposed to dopaminergic reinforcement learning circuits  
888 (Diedrichsen et al., 2005; Ito, 2000; Krakauer et al., 2004; Tanaka et al., 2009; Jordan  
889 A. Taylor et al., 2010; Wong et al., 2019).

890

891 It has previously been shown that visuomotor rotation increases the amplitude of the  
892 P300 ERP component, a centro-parietal ERP deflection peaking approximately 300-  
893 400ms following feedback presentation (Aziz et al., 2020; MacLean et al., 2015; Palidis  
894 et al., 2019). In the present study, we observed an interaction effect between feedback  
895 rotation and drug condition on the P300 amplitude. P300 amplitude increased in

896 response to visuomotor rotations in the placebo condition but not in the levodopa  
897 condition. This result replicates previous findings that visuomotor rotations increase the  
898 amplitude of P300 responses to feedback, and additionally suggests that this effect is  
899 dependent on dopaminergic signaling. The modulation of P300 amplitude by sensory  
900 error is clearly not essential for adaptation, as disruption of this effect by levodopa did  
901 not correspond with any behavioral changes. Previous findings have also suggested a  
902 relationship between dopamine function and the P300 response, however the neural  
903 mechanisms and functional significance of the P300 in relation to motor adaptation  
904 remain unclear (Chu et al., 2018; Hansenne et al., 1995; Mulert et al., 2006; Noble et  
905 al., 1994; Sohn et al., 1998; Stanzione et al., 1990, 1991; Takeshita & Ogura, 1994).  
906 Variants of the P300 are elicited by many types of task-relevant stimuli, and have been  
907 localized to diffuse cortical areas including parietal, frontal, and motor regions, which  
908 have been implicated in processing prediction error (Bledowski et al., 2004; Calhoun et  
909 al., 2006; Johnson et al., 2019; Li et al., 2009; Mantini et al., 2009; Polich, 2007;  
910 Ragazzoni et al., 2019; Sabeti et al., 2016; Soltani & Knight, 2000). We observed a  
911 similar interaction effect between rotation and drug condition in recordings from  
912 electrode FCz during the FRN/RP time window. This appeared to be largely attributable  
913 to the P300 effect described above, as the time windows were mostly overlapping and  
914 the P300 was clearly measured at FCz as well.

915  
916 *Reward learning task:* Participants adapted reliably to manipulations of binary  
917 reinforcement feedback intended to produce either progressively clockwise or  
918 counterclockwise reach angles. However, we found no effects of levodopa on  
919 adaptation. One explanation of our findings is that the behavioral and neural processes  
920 measured in the current study do not depend on dopaminergic reward learning  
921 mechanisms. Another possibility is that the drug manipulation was not sufficiently  
922 powerful to disrupt these processes. The former interpretation depends on previous  
923 findings that levodopa impairs cognitive forms of reward learning using the same drug  
924 administration protocols in similar populations. However, the current study is limited by  
925 the lack of a positive control task demonstrating known behavioral effects of levodopa.  
926 Quattrocchi et al. (2018) found no effect of levodopa or a dopamine antagonist  
927 haloperidol on modulation of sensory error-based learning by additional reinforcement  
928 feedback. Holland et al. (2019) found no association between dopamine-related gene  
929 polymorphisms on adaptation through binary reinforcement feedback in a task similar to  
930 that used in the current study. Together, these findings suggest that reward-based  
931 motor adaptation may not rely on dopamine function, or at least that additional  
932 mechanisms may compensate for differences in dopamine function.

933  
934 The “dopamine overdose” hypothesis states that dopaminergic medications such as  
935 levodopa might disrupt learning processes mediated by the ventral striatum by  
936 overstimulating dopamine signaling in this brain region. The ventral striatum may  
937 specifically mediate stimulus-based reinforcement learning, while action-based  
938 reinforcement learning in the current study may be subserved by the dorsal striatum  
939 (Rothenhoefer et al., 2017). Furthermore, levodopa may specifically impair learning  
940 from unfavorable outcomes as opposed to rewarding outcomes (Cools et al., 2006,  
941 2007; Frank et al., 2004; Vo et al., 2018). Non-reward outcomes in the current task may

942 not contribute significantly to learning as they do not instruct the correct response,  
943 unlike in binary response tasks.

944  
945 Another important distinction is between model-free and model-based reinforcement  
946 learning processes (Babayan et al., 2018; Daw et al., 2011; Deserno et al., 2015; Dolan  
947 & Dayan, 2013; Doll et al., 2016; Gardner et al., 2018; Gläscher et al., 2010; Russek et  
948 al., 2017; Sambrook et al., 2018; Shahar et al., 2019; Sharp et al., 2016). Model-free  
949 reinforcement learning is characterized by reinforcement of simple stimulus-response  
950 associations that facilitate habitual, reflexive responding. Model-based learning allows  
951 for flexible planning according to a mental representation of the task, and can be limited  
952 by working memory processes. Levodopa has been shown to impair reward-based  
953 learning in healthy controls and people with Parkinson's disease, but to improve model-  
954 based learning and related cognitive functions such as working memory, cognitive  
955 flexibility, and attention (Beato et al., 2008; R. Cools et al., 2001; Roshan Cools et al.,  
956 2003; Cooper et al., 1992; Costa et al., 2003; Kulisevsky, 2000; Lange et al., 1992;  
957 Lewis et al., 2005; Marini et al., 2003; Moustafa et al., 2008; Sharp et al., 2016; Torta et  
958 al., 2009; Wunderlich et al., 2012). It is possible that "dopamine overdose" by levodopa  
959 selectively impairs model-free learning. It may be that reward-based motor adaptation in  
960 the current study relies on processes other than model-free learning that are not  
961 affected by levodopa. Reward-based motor adaptation tasks similar to that in the  
962 current study have been shown to primarily involve strategic aiming that can be  
963 influenced by explicit instructions and cognitive load, characteristics that are  
964 inconsistent with model-free learning (Codol et al., 2018; Holland et al., 2018).

965  
966 We also analyzed the variability of trial-by-trial changes in reach angle as a function of  
967 reward outcomes. Reward related modulation of motor variability has been shown to be  
968 impaired in medicated Parkinson's disease in a very similar task (Pekny et al., 2015).  
969 We hypothesized that this effect may be due to side-effects of dopaminergic medication,  
970 and that we would observe similar impairments in healthy participants after levodopa  
971 administration. However, we observed no effect of levodopa on reward-related  
972 modulation of motor variability. Reward-based modulation of exploratory variance may  
973 therefore not depend on the ventral striatum, which is relatively spared in early stage  
974 Parkinson's disease and therefore vulnerable to "dopamine overdose" in patients and  
975 healthy controls alike. Instead, it may depend on the dorsal striatum, which is more  
976 closely related to movement planning and is primarily impacted by early stage  
977 Parkinson's disease.

978  
979 Reinforcement feedback elicited a very reliable FRN/RP ERP component. Meta  
980 analyses have shown that the FRN/RP encodes a quantitative reward prediction error  
981 across multiple different tasks (Sambrook & Goslin, 2015; Walsh & Anderson, 2012).  
982 Reports have linked the FRN/RP signal to behavioral adjustments in response to  
983 feedback (Arbel et al., 2013; Frank et al., 2005; Holroyd & Krigolson, 2007; van der  
984 Helden et al., 2010). These findings support a prominent theory purporting that the  
985 FRN/RP is a reflection of reinforcement learning processes in the anterior cingulate  
986 cortex driven by phasic dopamine reward prediction error signals (Holroyd & Coles,  
987 2002; Walsh & Anderson, 2012). Contrary to our hypothesis, we observed no effects of

988 levodopa on the FRN/RP in response to reinforcement feedback. Previous studies have  
989 supported a link between dopamine and the FRN/RP, although results have been  
990 mixed. FRN/RP amplitude has been shown to be impaired in Parkinson's disease  
991 patients with apathy (Martínez-Horta et al., 2014). Brown et al. (2020) found that the  
992 reward positivity was impaired in Parkinson's disease patients relative to controls ON  
993 levodopa but not OFF levodopa, consistent with the dopamine overdose hypothesis. In  
994 healthy participants, the dopamine antagonist haloperidol has shown mixed results in  
995 reducing the amplitude of the reward positivity (Forster et al., 2017; Schutte et al.,  
996 2020). Mueller et al. (2014) found that the D2 receptor dopamine antagonist sulpiride  
997 had opposite effects on FRN/RP amplitude depending on a genotype variant that  
998 regulates prefrontal dopamine levels. They suggested a u-shaped relationship between  
999 dopamine release in the prefrontal cortex and FRN/RP amplitude mediated by the  
1000 balance between D1 and D2 receptor activation. Because the effect of dopamine  
1001 manipulation on the FRN/RP seems to depend on genetic differences in baseline  
1002 dopamine release, one possibility is that levodopa in the current study had inconsistent  
1003 effects on different subgroups of participants that cancelled each other in the group  
1004 average.

1005  
1006 *Force field adaptation task:* Participants reliably adapted to the clockwise force field  
1007 imposed in blocks FF1a and FF1b, and we found no evidence that adaptation was  
1008 affected by levodopa. This was expected as force field adaptation is thought to rely  
1009 primarily on sensory error-based learning mechanisms involving the cerebellum.  
1010 Savings and interference effects have been accounted for by an additional process  
1011 involving operant reinforcement of adapted motor commands upon repetition of  
1012 successful reaches (Huang et al., 2011). These distinctions are supported by findings  
1013 that cerebellar degeneration impairs force field adaptation while Parkinson's disease  
1014 patients are spared in initial adaptation but display deficient savings and interference  
1015 (Bédard & Sanes, 2011; Leow et al., 2012, 2013; Maschke et al., 2004; Jordan A.  
1016 Taylor et al., 2010). Thus, we hypothesized that dopaminergic perturbation by levodopa  
1017 would impair savings and interference while leaving initial adaptation intact. We found  
1018 no effect of levodopa on savings or interference. Impaired savings may therefore be a  
1019 specific effect of Parkinson's disease as opposed to a side-effect of levodopa. This is  
1020 consistent with the findings of Marinelli et al. (2009), who observed a lack of savings  
1021 effects in drug-naive and off-medication PD patients. An important limitation is that our  
1022 experimental protocol was likely insufficient to produce savings or interference even in  
1023 the control group, as we observed unreliable evidence of savings overall. Savings and  
1024 interference have been shown to depend on sufficient repetition of the adapted  
1025 movements to produce reinforcement of the adapted movements (Huang et al., 2011;  
1026 Orban de Xivry & Lefèvre, 2015). Because the current study involved reaches to 8  
1027 different targets, repetition and each individual target was limited relative to single target  
1028 experiments.

1029  
1030 *Conclusions:* As we expected, sensory error-based motor adaptation induced by  
1031 visuomotor rotations and force field perturbations was not vulnerable to disruption of  
1032 dopamine signaling by levodopa. This supports the notion that sensory error-based  
1033 learning is driven by circuits involving cerebellar and sensorimotor cortex distinct from



1034 dopaminergic reinforcement learning mechanisms. Contrary to our hypotheses, we did  
1035 not observe effects of levodopa on reward-based motor learning or the FRN/RP ERP  
1036 component, which have both been theorized to depend on dopaminergic signaling of  
1037 reward prediction error. The dopamine overdose hypothesis suggests that levodopa  
1038 impairs stimulus-response reinforcement learning processes in the ventral striatum.  
1039 Reward-based motor adaptation may instead depend on distinct reinforcement learning  
1040 circuits that are not disrupted by levodopa such as cortical reward learning mechanisms  
1041 or dopaminergic projections to the dorsal striatum.

1042 **Tables**  
1043

| Measure       | Placebo                                             | Levodopa                                            |
|---------------|-----------------------------------------------------|-----------------------------------------------------|
| Heart Rate    | Pre: 76.24 (SD: 11.29)<br>Post: 69.60 (SD: 7.27)    | Pre: 77.55 (SD: 8.41)<br>Post: 71.53 (SD: 6.92)     |
| Systolic      | Pre: 104.43 (SD: 9.01)<br>Post: 104.20 (SD: 6.47)   | Pre: 103.95 (SD: 8.34)<br>Post: 102.79 (SD: 8.70)   |
| Diastolic     | Pre: 72.14 (SD: 5.14)<br>Post: 73.20 (SD: 4.55)     | Pre: 70.55 (SD: 6.81)<br>Post: 69.74 (SD: 6.04)     |
| Alertness     | Pre: 64.58 (SD: 8.38)<br>Post: 47.99 (SD: 15.43)    | Pre: 58.20 (SD: 11.79)<br>Post: 48.16 (SD: 15.33)   |
| Response Time | RL: 464.09 (SD: 140.05)<br>VMR: 445.91 (SD: 120.96) | RL: 484.01 (SD: 149.00)<br>VMR: 460.24 (SD: 133.04) |
| Movement Time | RL: 548.17 (SD: 37.04)<br>VMR: 547.90 (SD: 34.92)   | RL: 547.14 (SD: 35.28)<br>VMR: 546.43 (SD: 40.52)   |

1044  
1045 *Table 1: Control measurements from experiment 1. Heart rate (bpm). Systolic blood*  
1046 *pressure (mm Hg). Diastolic blood pressure (mm Hg). Alertness, Bond-Lader visual*  
1047 *analog scale alertness measure. Response Time, latency between go cue and hand*  
1048 *exiting the start position (ms). Movement Time, duration of movement (ms). RL, reward*  
1049 *learning task. VMR, visuomotor rotation task.*

1050  
1051  
1052  
1053  
1054  
1055  
1056  
1057  
1058  
1059  
1060  
1061  
1062  
1063  
1064  
1065  
1066

| Measure         | Placebo                                         | Levodopa                                         |
|-----------------|-------------------------------------------------|--------------------------------------------------|
| <i>n</i>        | 19                                              | 19                                               |
| <i>n</i> female | 9                                               | 10                                               |
| Age             | 21.2 (SD: 2.5)                                  | 22.2 (SD: 3.4 years)                             |
| Heart Rate      | Pre: 75.1 (SD: 9.5)<br>Post: 66.2 (SD: 10.2)    | Pre: 71.6842 (SD: 12.8)<br>Post: 65.7 (SD: 11.3) |
| Systolic        | Pre: 109.2 (SD: 15.4)<br>Post: 104.8 (SD: 14.5) | Pre: 108.4 (SD: 11.4)<br>Post: 99.7 (SD: 10.1)   |
| Diastolic       | Pre: 72.0 (SD: 10.2)<br>Post: 70.1 (SD: 10.2)   | Pre: 73.2 (SD: 15.5)<br>Post: 67.0 (SD: 8.2)     |
| Alertness       | Pre: 31.3 (SD: 15.3)<br>Post: 39.4 (SD: 17.0)   | Pre: 27.1 (SD: 11.0)<br>Post: 43.4 (SD: 12.7)    |
| Peak Velocity   | 0.43 (SD = 0.01)                                | 0.43 (SD = 0.02)                                 |

1067  
1068  
1069  
1070  
1071  
1072  
1073  
1074  
1075  
1076  
1077  
1078  
1079  
1080  
1081  
1082  
1083  
1084  
1085  
1086  
1087  
1088  
1089  
1090  
1091

*Table 2:* Control measurements from Experiment 2. Heart rate (bpm). Systolic blood pressure (mm Hg). Diastolic blood pressure (mm Hg). Alertness, Bond-Lader visual analog scale alertness measure. Peak Velocity, maximum tangential velocity of the hand averaged across trials (m/s).

## One Sample T-Tests

| Placebo Non-Catch Trials        | t     | df | p         | BF        | Sample Mean | 95% CI for Sample Mean |       |
|---------------------------------|-------|----|-----------|-----------|-------------|------------------------|-------|
|                                 |       |    |           |           |             | Lower                  | Upper |
| early adaptation                | 10.60 | 18 | 3.62e -9  | 6.36e +6  | 0.47        | 0.38                   | 0.56  |
| late adaptation                 | 12.54 | 18 | 2.48e -10 | 7.72e +7  | 0.62        | 0.52                   | 0.73  |
| early savings                   | 1.56  | 18 | 0.14      | 1.23      | 0.05        | -0.02                  | 0.13  |
| late savings                    | 0.70  | 18 | 0.50      | 0.44      | 0.02        | -0.04                  | 0.08  |
| early after-effects             | 9.06  | 18 | 4.00e -8  | 688519.55 | 0.31        | 0.24                   | 0.38  |
| late after-effects              | 3.78  | 18 | 1.37e -3  | 56.24     | 0.09        | 0.04                   | 0.14  |
| early adaptation (interference) | 11.46 | 18 | 1.06e -9  | 2.00e +7  | 0.76        | 0.62                   | 0.89  |
| late adaptation (interference)  | 15.70 | 18 | 5.98e -12 | 2.51e +9  | 1.18        | 1.02                   | 1.34  |
| Levodopa Non-Catch Trials       | t     | df | p         | BF        | Sample Mean | Lower                  | Upper |
| early adaptation                | 8.76  | 18 | 6.61e -8  | 432847.50 | 0.46        | 0.35                   | 0.57  |
| late adaptation                 | 10.42 | 18 | 4.71e -9  | 4.99e +6  | 0.67        | 0.53                   | 0.80  |
| early savings                   | 1.67  | 18 | 0.11      | 1.43      | 0.06        | -0.02                  | 0.14  |
| late savings                    | -0.40 | 18 | 0.70      | 0.18      | -0.01       | -0.07                  | 0.05  |
| early after-effects             | 10.84 | 18 | 2.56e -9  | 8.79e +6  | 0.31        | 0.25                   | 0.37  |
| late after-effects              | 3.94  | 18 | 9.66e -4  | 76.15     | 0.08        | 0.04                   | 0.12  |
| early adaptation (interference) | 6.59  | 18 | 3.42e -6  | 11657.42  | 0.61        | 0.42                   | 0.81  |
| late adaptation (interference)  | 11.12 | 18 | 1.70e -9  | 1.28e +7  | 1.02        | 0.83                   | 1.21  |
| Placebo Catch Trials            | t     | df | p         | BF        | Sample Mean | Lower                  | Upper |
| early adaptation                | 9.25  | 17 | 4.82e -8  | 574167.17 | 0.73        | 0.57                   | 0.90  |
| late adaptation                 | 7.90  | 18 | 2.92e -7  | 110521.90 | 0.94        | 0.69                   | 1.19  |
| early savings                   | 0.36  | 17 | 0.72      | 0.33      | 0.04        | -0.20                  | 0.28  |
| late savings                    | 1.54  | 18 | 0.14      | 1.20      | 0.27        | -0.10                  | 0.63  |
| early adaptation (interference) | 5.17  | 18 | 6.37e -5  | 837.09    | 0.82        | 0.49                   | 1.15  |
| late adaptation (interference)  | 7.68  | 18 | 4.33e -7  | 77010.30  | 1.36        | 0.99                   | 1.74  |
| Levodopa Catch Trials           | t     | df | p         | BF        | Sample Mean | Lower                  | Upper |
| early adaptation                | 9.12  | 18 | 3.62e -8  | 755029.63 | 0.68        | 0.52                   | 0.83  |
| late adaptation                 | 14.40 | 18 | 2.54e -11 | 6.48e +8  | 0.96        | 0.82                   | 1.10  |
| early savings                   | -0.33 | 18 | 0.75      | 0.19      | -0.03       | -0.21                  | 0.15  |
| late savings                    | 0.99  | 18 | 0.33      | 0.60      | 0.09        | -0.11                  | 0.29  |
| early adaptation (interference) | 6.42  | 18 | 4.84e -6  | 8524.02   | 0.92        | 0.62                   | 1.22  |
| late adaptation (interference)  | 9.03  | 18 | 4.20e -8  | 657919.38 | 1.30        | 1.00                   | 1.60  |

## Independent Samples T-Tests

| Placebo vs Levodopa Non-Catch Trials | t     | df | p    | BF   | Mean Diff. | 95% CI for Mean Difference |       |
|--------------------------------------|-------|----|------|------|------------|----------------------------|-------|
|                                      |       |    |      |      |            | Lower                      | Upper |
| early adaptation                     | 0.22  | 36 | 0.83 | 0.37 | 0.01       | -0.12                      | 0.15  |
| late adaptation                      | -0.57 | 36 | 0.57 | 0.22 | -0.05      | -0.21                      | 0.12  |
| early savings                        | -0.16 | 36 | 0.87 | 0.28 | -7.98e -3  | -0.11                      | 0.09  |
| late savings                         | 0.77  | 36 | 0.45 | 0.59 | 0.03       | -0.05                      | 0.11  |
| early after-effects                  | 0.02  | 36 | 0.99 | 0.32 | 8.12e -4   | -0.09                      | 0.09  |
| late after-effects                   | 0.28  | 36 | 0.78 | 0.39 | 8.67e -3   | -0.05                      | 0.07  |
| early adaptation (interference)      | 1.23  | 36 | 0.23 | 0.16 | 0.14       | -0.09                      | 0.37  |
| late adaptation (interference)       | 1.38  | 36 | 0.18 | 0.15 | 0.16       | -0.08                      | 0.40  |
| Placebo vs Levodopa Catch Trials     | t     | df | p    | BF   | Mean Diff. | Lower                      | Upper |
| early adaptation                     | 0.51  | 35 | 0.61 | 0.47 | 0.06       | -0.16                      | 0.28  |
| late adaptation                      | -0.12 | 36 | 0.90 | 0.29 | -0.02      | -0.29                      | 0.26  |
| early savings                        | 0.49  | 35 | 0.63 | 0.47 | 0.07       | -0.22                      | 0.36  |
| late savings                         | 0.87  | 36 | 0.39 | 0.66 | 0.17       | -0.23                      | 0.57  |
| early adaptation (interference)      | -0.46 | 36 | 0.65 | 0.45 | -0.10      | -0.53                      | 0.33  |
| late adaptation (interference)       | 0.29  | 36 | 0.77 | 0.26 | 0.07       | -0.40                      | 0.53  |

1092  
1093  
1094  
1095  
1096

Table 2: Statistical results for experiment 2. In one-sample T-Tests, the null hypothesis was that the mean was equal to zero. T, T-statistic. DF, degrees of freedom. P, P-value. BF, Bayes factor in favor of the alternative hypothesis. 95% CI, frequentist confidence interval. Mean differences are computed as placebo-levodopa. Bayes factors were computed using one-tailed default

1097 priors for the alternative hypothesis. In all one-sample T-Tests, the alternative hypothesis was  
1098 that the population mean is greater than zero. For independent T-Tests, the alternative  
1099 hypothesis stated that adaptation with interference would be greater in the levodopa group than  
1100 the placebo group. For all other independent T-tests, the alternative hypothesis stated that the  
1101 measure of interest would be smaller in the levodopa group than the placebo group.

1102  
1103  
1104  
1105  
1106  
1107  
1108  
1109  
1110  
1111  
1112  
1113  
1114  
1115  
1116  
1117  
1118  
1119  
1120  
1121  
1122  
1123  
1124  
1125  
1126  
1127  
1128  
1129  
1130  
1131  
1132  
1133  
1134  
1135  
1136  
1137



1138 **Figures**

1139

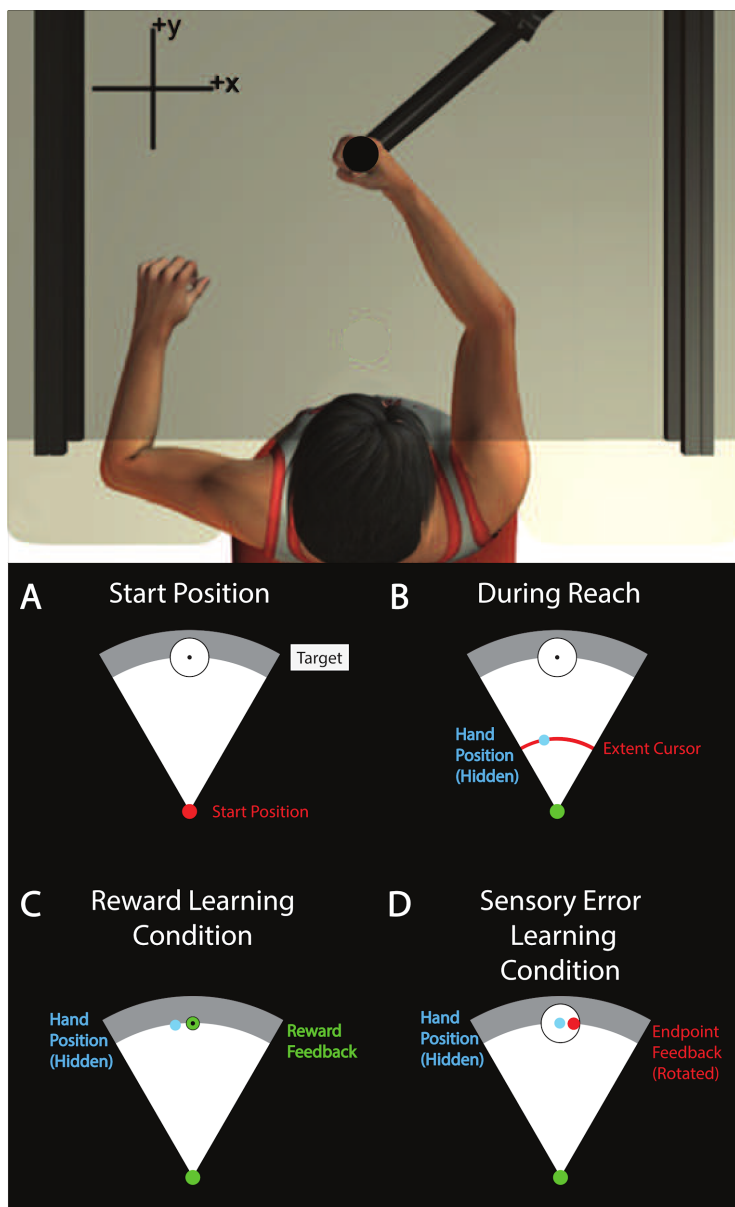

1140

1141

1142 **Figure 1.** Experimental setup. Top: Apparatus used in both experiments. Participants  
1143 reached to visual targets while holding the handle of a robotic arm. Vision of the arm  
1144 was obscured by a screen that displayed visual information related to the task. Bottom:  
1145 Illustrations of visual display in experiment 1. **A**, Participants made outward reaching  
1146 movements from a start position at body midline to a visual target. **B**, During reaches,  
1147 hand position was hidden but an arc-shaped cursor indicated the extent of the reach  
1148 without revealing reach angle. Feedback was provided at reach end point. **C**, In the  
1149 reward learning task, binary feedback represented whether reaches were successful or  
1150 unsuccessful in hitting the target by turning green or red, respectively. Reach adaptation  
1151 was induced by providing reward for movements that did not necessarily correspond to

1152 the visual target. **D**, In the visuomotor rotation task, cursor feedback represented the  
1153 end-point position of the hand. Adaptation was induced by shifting feedback relative to  
1154 the actual reach angle by rotating it about the start position.

1155

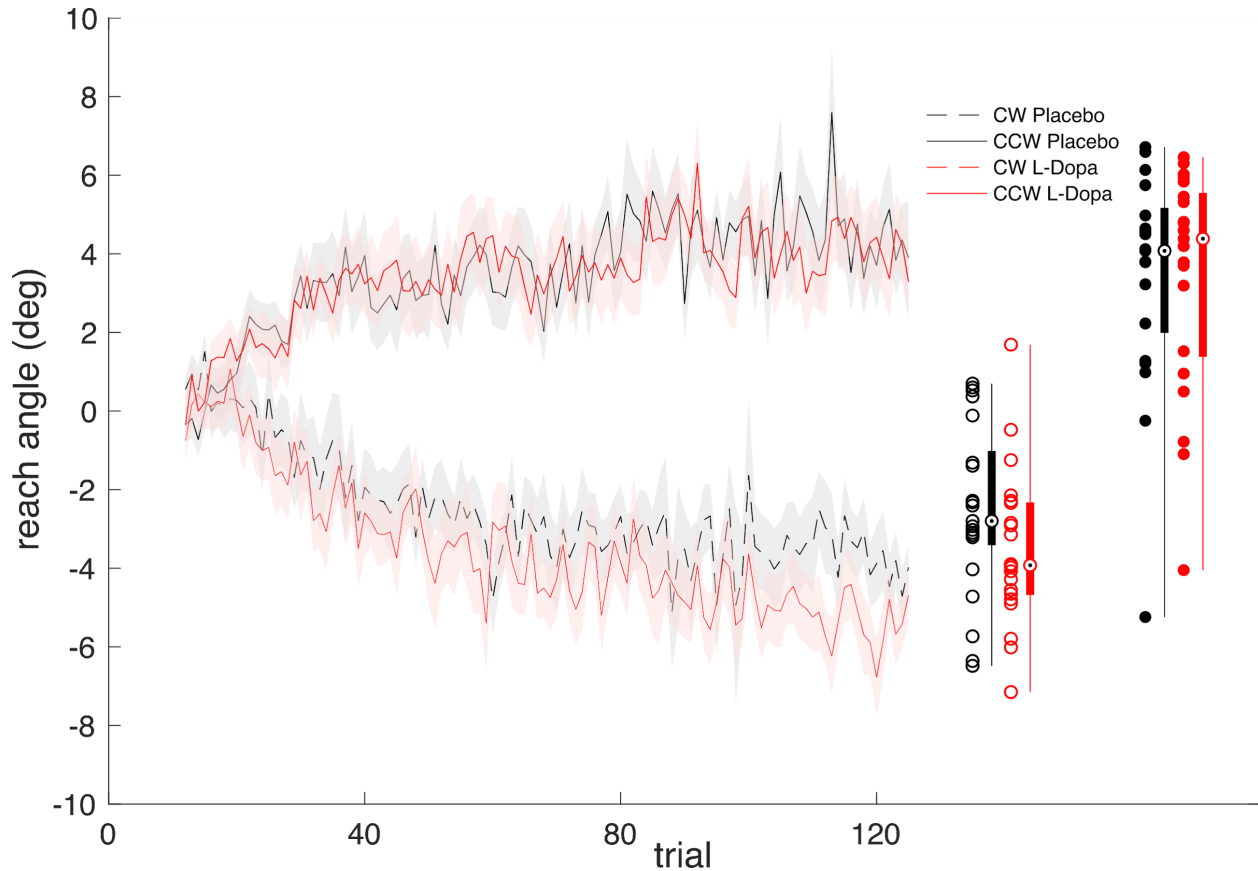

1156

1157 **Figure 2.** Reward-based motor adaptation (n=21). The time series show group average  
1158 reach angles in the reward learning task across trials (Shaded region:  $\pm$  SEM). After  
1159 both placebo and levodopa administration, participants completed a block in each  
1160 direction of intended learning condition [clockwise (CW) and counterclockwise (CCW)].  
1161 Trials 1-11 were baseline trials without reinforcement feedback, and are not shown.  
1162 Individual data points on the right show the average reach angles across trials in each  
1163 condition for each participant (CCW: solid markers, CW: open markers, black: placebo,  
1164 red: L-Dopa). Box plots summarize the distributions of individual data using circular  
1165 markers to indicate the medians, thick lines to indicate interquartile ranges, and thin  
1166 lines to indicate full ranges.

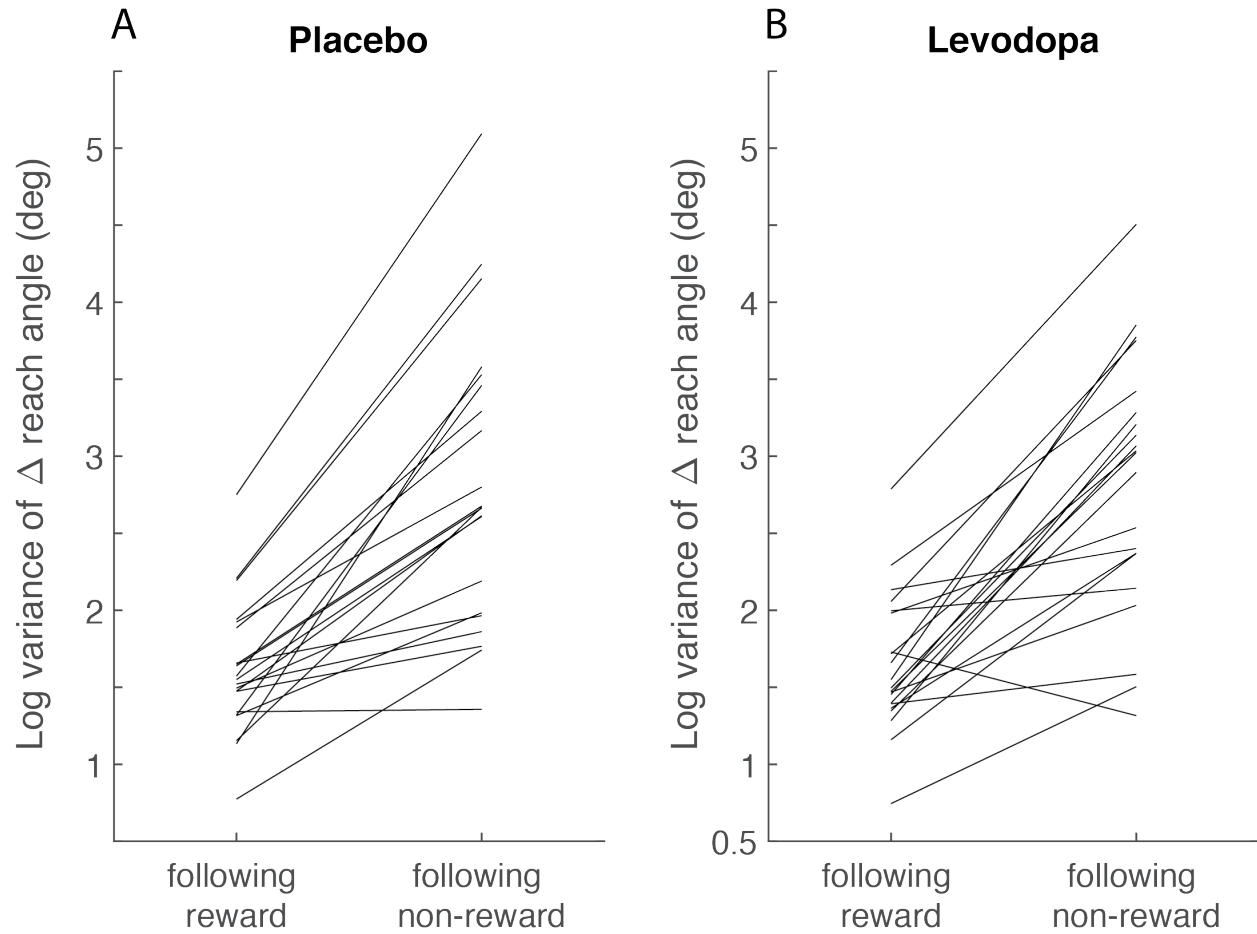

1167

1168

1169

1170

1171

1172

**Figure 3.** Reward induced modulation of trial-by-trial variability of reach angle (n=21). The log transformed variance of trial-by-trial changes in reach angle (deg) following reward and non-reward are plotted for each participant following administration of levodopa (A) and placebo (B).

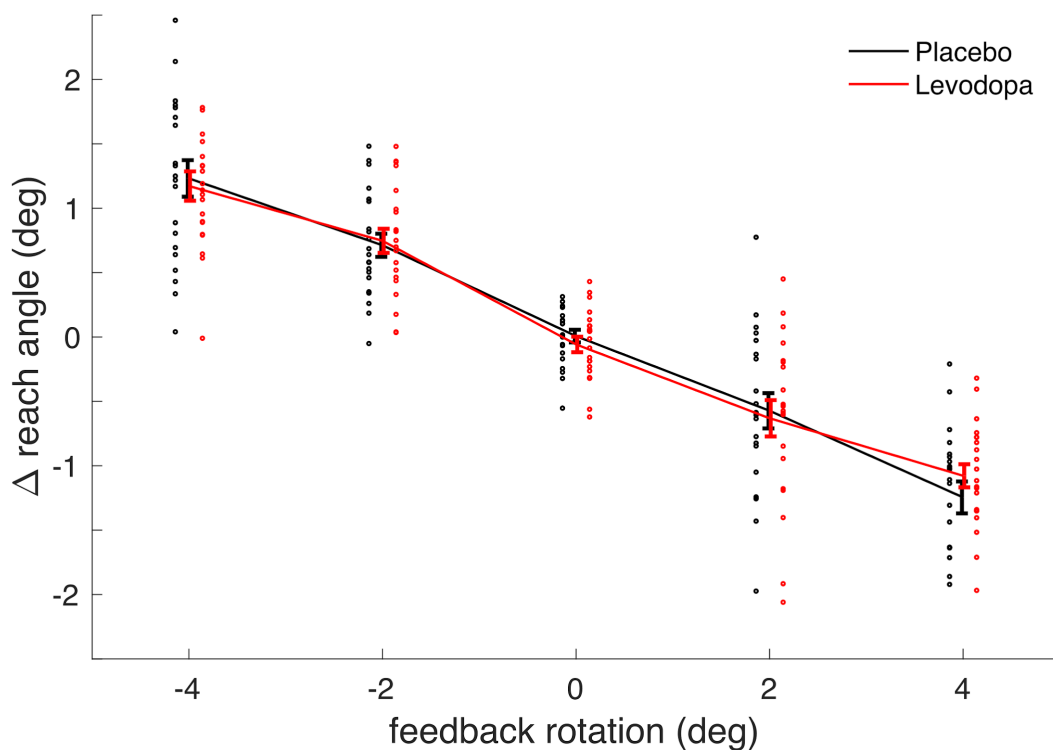

1173

1174

1175 **Figure 4.** Sensory error-based motor adaptation (n=21). The average change in reach  
1176 angle between subsequent pairs of trials is plotted for each size and direction of rotation  
1177 imposed on the preceding trial. The average change in reach angle is in all cases  
1178 opposite to the rotation, indicating that participants adapted their reaches to counteract  
1179 the perturbations. Individual data points show average changes in reach angle across  
1180 trials for each participant. Lines show average change in reach angle across  
1181 participants (Error bars:  $\pm$  SEM).

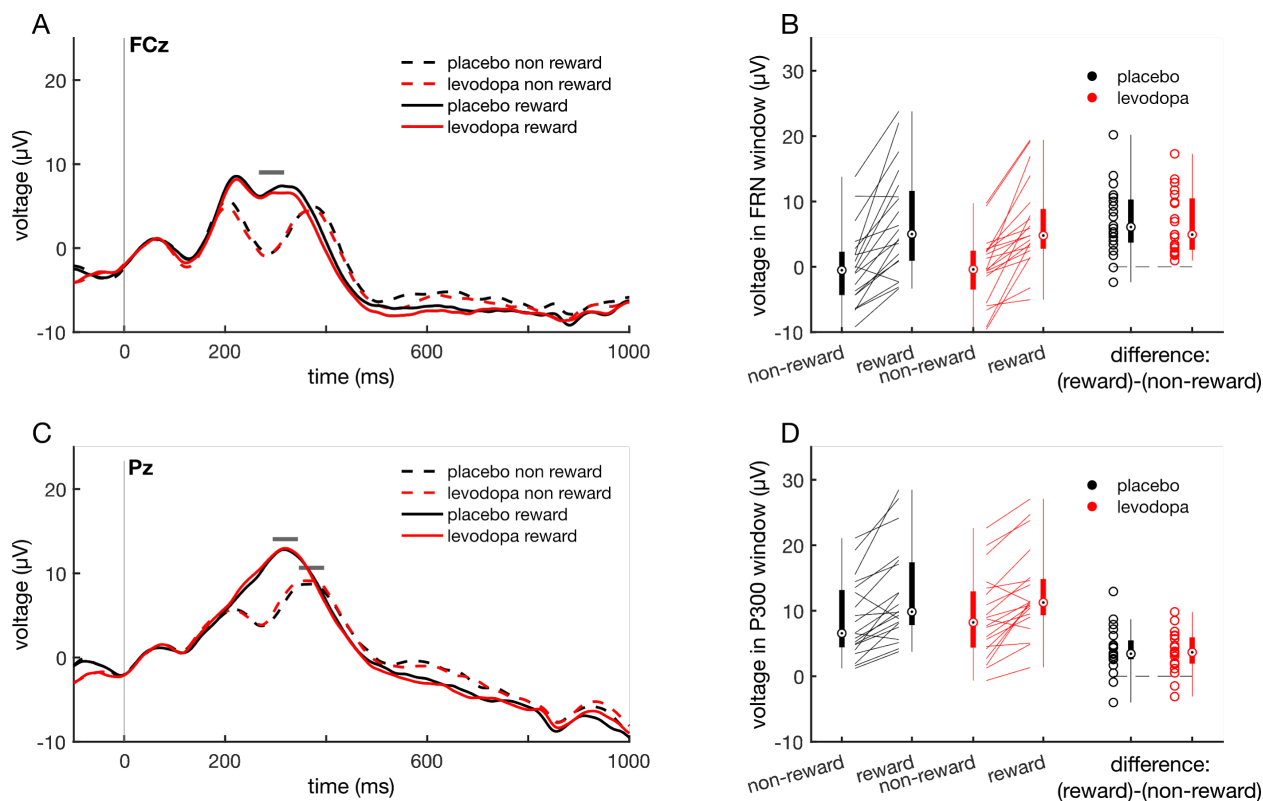

1182

1183

1184 **Figure 5.** Event-related potentials elicited by reinforcement feedback (n=20). **A**, Grand  
1185 averaged ERPs recorded from electrode FCz. ERPs are aligned to reinforcement  
1186 feedback presentation (0 ms: vertical grey line). Horizontal grey bar indicates time  
1187 window for FRN/RP analysis (267-317ms). Trials were selected by reinforcement  
1188 outcome (reward or non-reward) and drug condition (levodopa or placebo) for ERP  
1189 averaging. **B**, ERP amplitude during the FRN/RP time window. Individual participants'  
1190 data show amplitude following reward, non-reward, and the difference [(reward) - (non-  
1191 reward)]. Boxplots indicate the median (circular markers), the interquartile range (thick  
1192 bars) and the range (thin lines). **C**, Trial averaged ERPs recorded from electrode Pz.  
1193 Horizontal grey bars indicate time windows for P300 analysis (Reward: 294-344ms,  
1194 Non-reward: 346-396ms). **D**, ERP amplitudes during the P300 time windows, as in B.

1195



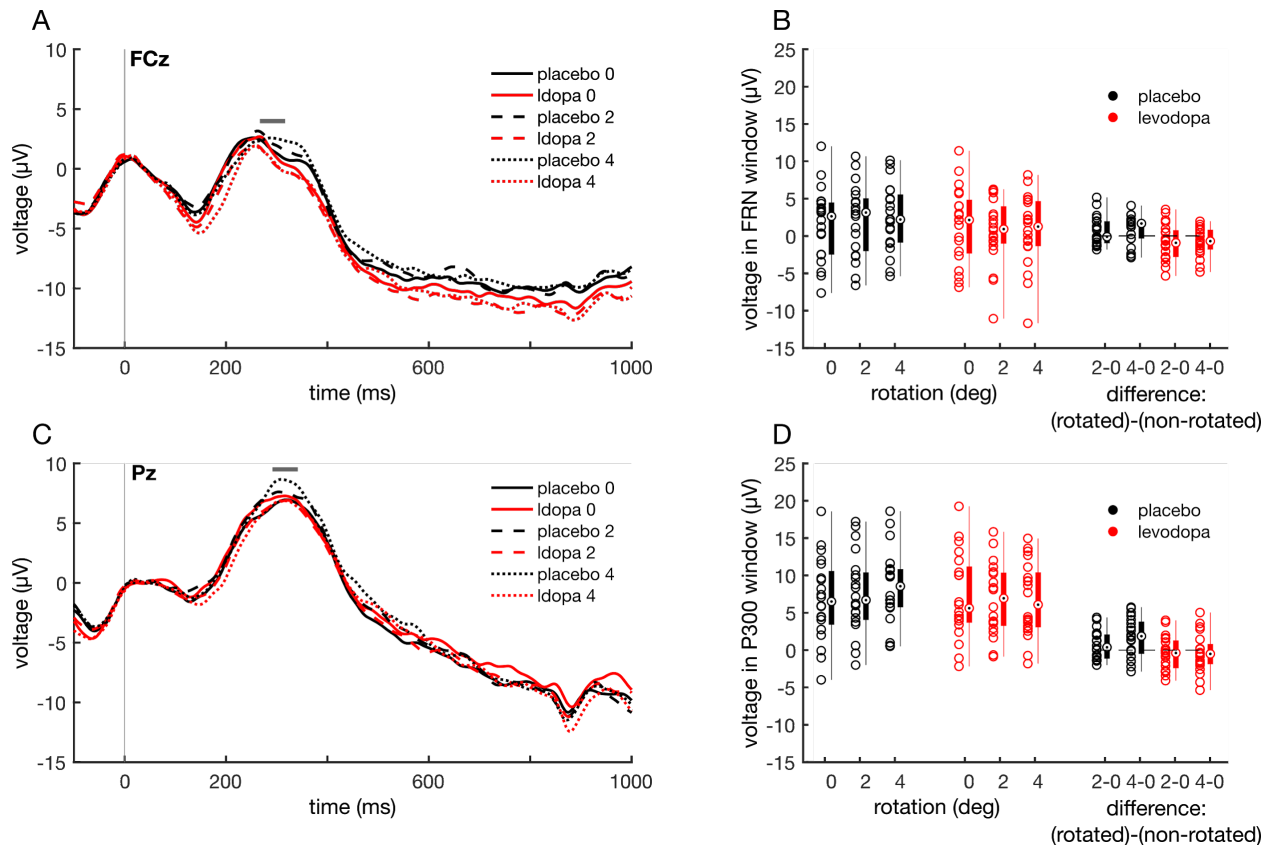

1196

1197 **Figure 6.** Event-related potentials elicited by endpoint cursor feedback (n=20). **A**, Grand  
1198 averaged ERPs recorded from electrode FCz. ERPs are aligned to endpoint cursor  
1199 feedback presentation (0 ms: vertical gray line). Horizontal grey bar indicates time  
1200 window for FRN/RP analysis (267-317ms). Trials were selected for feedback rotation  
1201 (0°, ±2°, or ±4°) and drug condition (levodopa or placebo) for ERP averaging. **B**, ERP  
1202 amplitude during the FRN/RP time window. Individual participants' data show amplitude  
1203 following unrotated feedback as well as feedback rotated by ±2°, and ±4°. Differences in  
1204 ERP amplitude between rotated and unrotated feedback are also shown for each  
1205 participant. Boxplots indicate the median (circular markers), the interquartile range (thick  
1206 bars) and the range (thin lines). **C**, Trial averaged ERPs recorded from electrode Pz.  
1207 Horizontal grey bars indicate time window for P300 analysis (292-342 ms). **D**, ERP  
1208 amplitudes during the P300 time windows, as in B.

1209

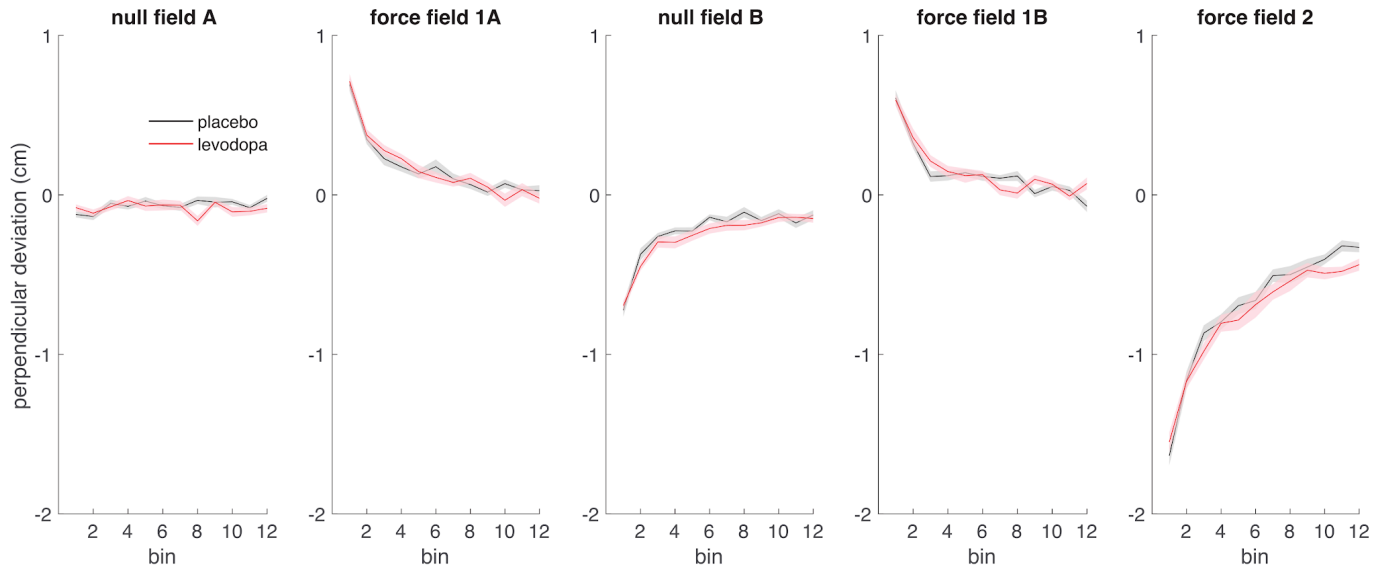

1210

1211

1212 **Figure 7.** Perpendicular deviation of reach trajectory during non-catch trial reaches.

1213 Average perpendicular deviation of the hand trajectory within bins consisting of 8 trials  
1214 each is shown in cm (Shaded region:  $\pm$  SEM). The placebo condition is shown in black  
1215 (n=19), and the levodopa condition is shown in red (n=19). Perpendicular deviation was  
1216 measured on each trial at peak tangential velocity. Trials 6, 24, 35, 50, 71, and 91 of  
1217 each block were catch trials, and were excluded from the corresponding bins. In *null*  
1218 *field A* and *null field B*, the robot did not apply external forces to the hand during  
1219 reaches. In *force field 1A* and *force field 1B*, participants made reaches in a clockwise  
1220 force field. In *force field 2* participants made reaches in a counterclockwise force field.

1221

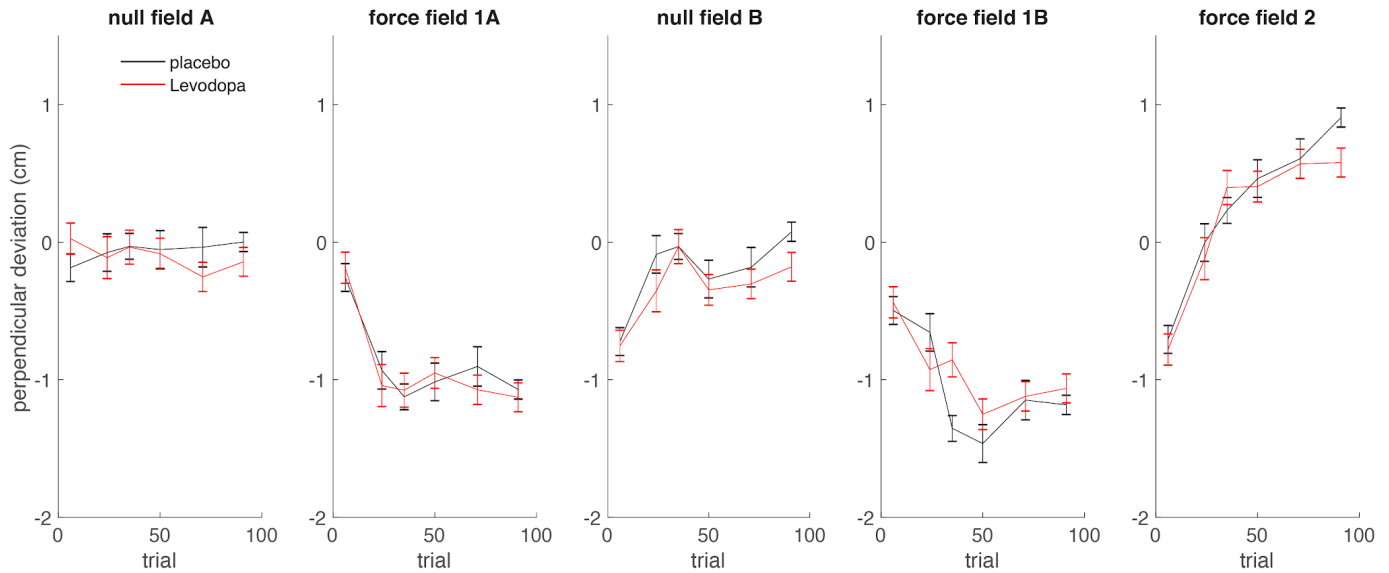

1222

1223

1224

1225

1226

1227

1228

1229

1230

1231

1232

1233

**Figure 8.** Perpendicular deviation of reach trajectory during catch trials. Perpendicular deviation of the hand trajectory, measured at peak tangential velocity, is shown in cm (Error bars:  $\pm$  SEM). The placebo condition is shown in black (n=19), and the levodopa condition is shown in red (n=19). Catch trials occurred on trials 6, 24, 35, 50, 71, and 91 of each block. In *null field A* and *null field B*, the robot did not apply external forces to the hand during reaches. In *force field 1A* and *force field 1B*, participants made reaches in a clockwise force field. In *force field 2* participants made reaches in a counterclockwise force field.

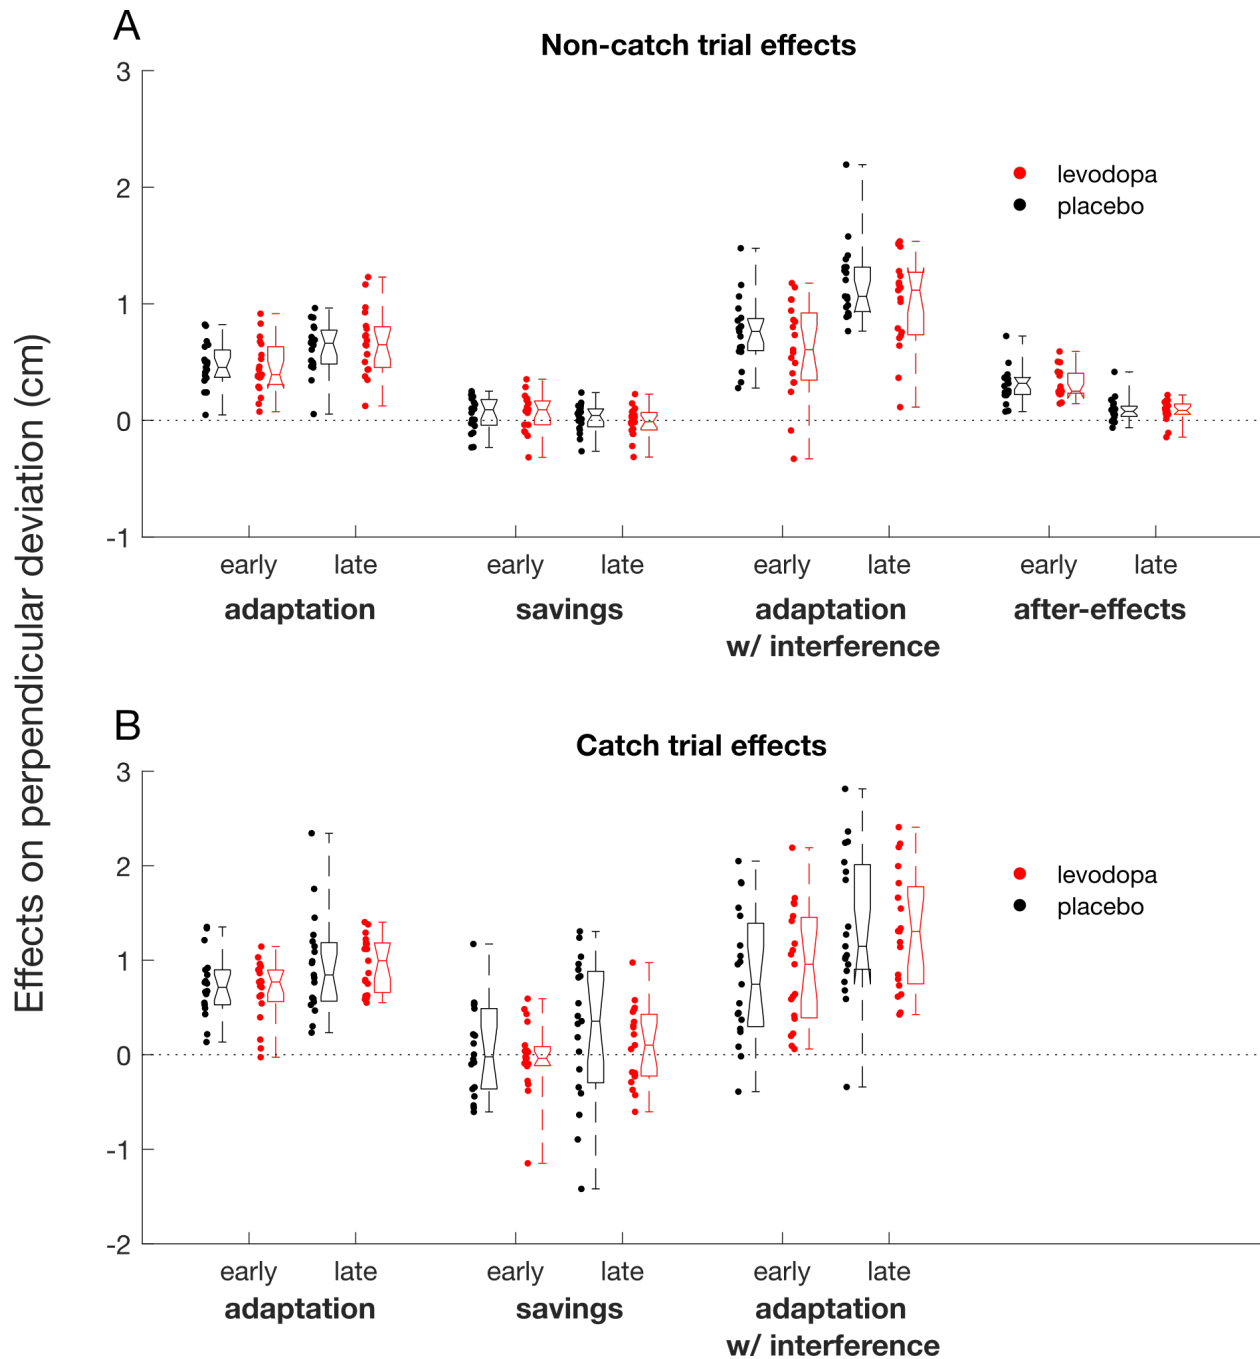

1234  
1235  
1236

1237 **Figure 9.** Adaptation effects in non-catch trials **A**, and catch trials **B**. Data points show  
1238 effects for individual participants, box plots show the median, interquartile range, and  
1239 full range. Effects are contrasts computed using perpendicular deviation (PD) of reach  
1240 trajectory (cm), such that zero corresponds to no effect. Adaptation: change in PD  
1241 during FF1a. Savings: difference in PD between FF1a and FF1b. After-effects:  
1242 difference in PD between Nfb and baseline from NFa. Adaptation w/ interference:  
1243 change in PD during FF2.

1244 **References**

1245

1246 Adams, R. A., Shipp, S., & Friston, K. J. (2013). Predictions not commands: Active inference in

1247 the motor system. *Brain Structure & Function*, 218(3), 611–643.

1248 <https://doi.org/10.1007/s00429-012-0475-5>

1249 Arbel, Y., Goforth, K., & Donchin, E. (2013). The Good, the Bad, or the Useful? The

1250 Examination of the Relationship between the Feedback-related Negativity (FRN) and

1251 Long-term Learning Outcomes. *Journal of Cognitive Neuroscience*, 25(8), 1249–1260.

1252 [https://doi.org/10.1162/jocn\\_a\\_00385](https://doi.org/10.1162/jocn_a_00385)

1253 Aziz, J. R., MacLean, S. J., Krigolson, O. E., & Eskes, G. A. (2020). Visual Feedback Modulates

1254 Aftereffects and Electrophysiological Markers of Prism Adaptation. *Frontiers in Human*

1255 *Neuroscience*, 14. <https://doi.org/10.3389/fnhum.2020.00138>

1256 Babayan, B. M., Uchida, N., & Gershman, S. J. (2018). Belief state representation in the

1257 dopamine system. *Nature Communications*, 9(1), 1891. [https://doi.org/10.1038/s41467-](https://doi.org/10.1038/s41467-018-04397-0)

1258 [018-04397-0](https://doi.org/10.1038/s41467-018-04397-0)

1259 Bayer, H. M., & Glimcher, P. W. (2005). Midbrain Dopamine Neurons Encode a Quantitative

1260 Reward Prediction Error Signal. *Neuron*, 47(1), 129–141.

1261 <https://doi.org/10.1016/j.neuron.2005.05.020>

1262 Beato, R., Levy, R., Pillon, B., Vidal, C., du Montcel, S. T., Deweer, B., Bonnet, A.-M., Houeto,

1263 J.-L., Dubois, B., & Cardoso, F. (2008). Working memory in Parkinson's disease

1264 patients: Clinical features and response to levodopa. *Arquivos De Neuro-Psiquiatria*,

1265 66(2A), 147–151. <https://doi.org/10.1590/s0004-282x2008000200001>

1266 Becker, M. P. I., Nitsch, A. M., Miltner, W. H. R., & Straube, T. (2014). A single-trial estimation

1267 of the feedback-related negativity and its relation to BOLD responses in a time-



- 1268 estimation task. *The Journal of Neuroscience: The Official Journal of the Society for*  
1269 *Neuroscience*, 34(8), 3005–3012. <https://doi.org/10.1523/JNEUROSCI.3684-13.2014>
- 1270 Bédard, P., & Sanes, J. N. (2011). Basal ganglia-dependent processes in recalling learned visual-  
1271 motor adaptations. *Experimental Brain Research*, 209(3), 385–393.  
1272 <https://doi.org/10.1007/s00221-011-2561-y>
- 1273 Bernardi, N. F., Darainy, M., & Ostry, D. J. (2015). Somatosensory Contribution to the Initial  
1274 Stages of Human Motor Learning. *Journal of Neuroscience*, 35(42), 14316–14326.  
1275 <https://doi.org/10.1523/JNEUROSCI.1344-15.2015>
- 1276 Bhanpuri, N. H., Okamura, A. M., & Bastian, A. J. (2013). Predictive Modeling by the  
1277 Cerebellum Improves Proprioception. *Journal of Neuroscience*, 33(36), 14301–14306.  
1278 <https://doi.org/10.1523/JNEUROSCI.0784-13.2013>
- 1279 Bledowski, C., Prvulovic, D., Hoechstetter, K., Scherg, M., Wibral, M., Goebel, R., & Linden,  
1280 D. E. J. (2004). Localizing P300 generators in visual target and distractor processing: A  
1281 combined event-related potential and functional magnetic resonance imaging study. *The*  
1282 *Journal of Neuroscience: The Official Journal of the Society for Neuroscience*, 24(42),  
1283 9353–9360. <https://doi.org/10.1523/JNEUROSCI.1897-04.2004>
- 1284 Bock, O., Schneider, S., & Bloomberg, J. (2001). Conditions for interference versus facilitation  
1285 during sequential sensorimotor adaptation. *Experimental Brain Research*, 138(3), 359–  
1286 365. <https://doi.org/10.1007/s002210100704>
- 1287 Bond, A., & Lader, M. (1974). The use of analogue scales in rating subjective feelings. *British*  
1288 *Journal of Medical Psychology*, 47(3), 211–218. [https://doi.org/10.1111/j.2044-](https://doi.org/10.1111/j.2044-8341.1974.tb02285.x)  
1289 [8341.1974.tb02285.x](https://doi.org/10.1111/j.2044-8341.1974.tb02285.x)

- 1290 Brooks, J. L., Zoumpoulaki, A., & Bowman, H. (2017). Data-driven region-of-interest selection  
1291 without inflating Type I error rate. *Psychophysiology*, *54*(1), 100–113.  
1292 <https://doi.org/10.1111/psyp.12682>
- 1293 Brown, D. R., Richardson, S. P., & Cavanagh, J. F. (2020). An EEG marker of reward  
1294 processing is diminished in Parkinson’s disease. *Brain Research*, *1727*, 146541.  
1295 <https://doi.org/10.1016/j.brainres.2019.146541>
- 1296 Calhoun, V. D., Adali, T., Pearlson, G. D., & Kiehl, K. A. (2006). Neuronal chronometry of  
1297 target detection: Fusion of hemodynamic and event-related potential data. *NeuroImage*,  
1298 *30*(2), 544–553. <https://doi.org/10.1016/j.neuroimage.2005.08.060>
- 1299 Carlson, J. M., Foti, D., Mujica-Parodi, L. R., Harmon-Jones, E., & Hajcak, G. (2011). Ventral  
1300 striatal and medial prefrontal BOLD activation is correlated with reward-related  
1301 electrocortical activity: A combined ERP and fMRI study. *NeuroImage*, *57*(4), 1608–  
1302 1616. <https://doi.org/10.1016/j.neuroimage.2011.05.037>
- 1303 Cashaback, J. G. A., Lao, C. K., Palidis, D. J., Coltman, S. K., McGregor, H. R., & Gribble, P. L.  
1304 (2019). The gradient of the reinforcement landscape influences sensorimotor learning.  
1305 *PLOS Computational Biology*, *15*(3), e1006839.  
1306 <https://doi.org/10.1371/journal.pcbi.1006839>
- 1307 Cashaback, J. G. A., McGregor, H. R., Mohatarem, A., & Gribble, P. L. (2017). Dissociating  
1308 error-based and reinforcement-based loss functions during sensorimotor learning. *PLoS*  
1309 *Computational Biology*, *13*(7), e1005623. <https://doi.org/10.1371/journal.pcbi.1005623>
- 1310 Chu, C.-L., Lee, I. H., Chi, M. H., Chen, K. C., Chen, P. S., Yao, W. J., Chiu, N. T., & Yang, Y.  
1311 K. (2018). Availability of dopamine transporters and auditory P300 abnormalities in

- 1312 adults with attention-deficit hyperactivity disorder: Preliminary results. *CNS Spectrums*,  
1313 23(4), 264–270. <https://doi.org/10.1017/S1092852917000049>
- 1314 Codol, O., Holland, P. J., & Galea, J. M. (2018). The relationship between reinforcement and  
1315 explicit control during visuomotor adaptation. *Scientific Reports*, 8(1), 9121.  
1316 <https://doi.org/10.1038/s41598-018-27378-1>
- 1317 Cools, R., Barker, R. A., Sahakian, B. J., & Robbins, T. W. (2001). Enhanced or impaired  
1318 cognitive function in Parkinson's disease as a function of dopaminergic medication and  
1319 task demands. *Cerebral Cortex (New York, N.Y.: 1991)*, 11(12), 1136–1143.  
1320 <https://doi.org/10.1093/cercor/11.12.1136>
- 1321 Cools, Roshan, Altamirano, L., & D'Esposito, M. (2006). Reversal learning in Parkinson's  
1322 disease depends on medication status and outcome valence. *Neuropsychologia*, 44(10),  
1323 1663–1673. <https://doi.org/10.1016/j.neuropsychologia.2006.03.030>
- 1324 Cools, Roshan, Barker, R. A., Sahakian, B. J., & Robbins, T. W. (2003). L-Dopa medication  
1325 remediates cognitive inflexibility, but increases impulsivity in patients with Parkinson's  
1326 disease. *Neuropsychologia*, 41(11), 1431–1441. [https://doi.org/10.1016/s0028-](https://doi.org/10.1016/s0028-3932(03)00117-9)  
1327 [3932\(03\)00117-9](https://doi.org/10.1016/s0028-3932(03)00117-9)
- 1328 Cools, Roshan, Lewis, S. J. G., Clark, L., Barker, R. A., & Robbins, T. W. (2007). L-DOPA  
1329 disrupts activity in the nucleus accumbens during reversal learning in Parkinson's  
1330 disease. *Neuropsychopharmacology: Official Publication of the American College of*  
1331 *Neuropsychopharmacology*, 32(1), 180–189. <https://doi.org/10.1038/sj.npp.1301153>
- 1332 Cooper, J. A., Sagar, H. J., Doherty, S. M., Jordan, N., Tidswell, P., & Sullivan, E. V. (1992).  
1333 Different effects of dopaminergic and anticholinergic therapies on cognitive and motor

- 1334 function in Parkinson's disease. A follow-up study of untreated patients. *Brain: A*  
1335 *Journal of Neurology*, 115 ( Pt 6), 1701–1725. <https://doi.org/10.1093/brain/115.6.1701>
- 1336 Costa, A., Peppe, A., Dell'Agnello, G., Carlesimo, G. A., Murri, L., Bonuccelli, U., &  
1337 Caltagirone, C. (2003). Dopaminergic modulation of visual-spatial working memory in  
1338 Parkinson's disease. *Dementia and Geriatric Cognitive Disorders*, 15(2), 55–66.  
1339 <https://doi.org/10.1159/000067968>
- 1340 Daw, N. D., Gershman, S. J., Seymour, B., Dayan, P., & Dolan, R. J. (2011). Model-based  
1341 influences on humans' choices and striatal prediction errors. *Neuron*, 69(6), 1204–1215.  
1342 <https://doi.org/10.1016/j.neuron.2011.02.027>
- 1343 Daw, N. D., & Tobler, P. N. (2014). Chapter 15 - Value Learning through Reinforcement: The  
1344 Basics of Dopamine and Reinforcement Learning. In P. W. Glimcher & E. Fehr (Eds.),  
1345 *Neuroeconomics (Second Edition)* (pp. 283–298). Academic Press.  
1346 <https://doi.org/10.1016/B978-0-12-416008-8.00015-2>
- 1347 Delorme, A., & Makeig, S. (2004). EEGLAB: An open source toolbox for analysis of single-trial  
1348 EEG dynamics including independent component analysis. *Journal of Neuroscience*  
1349 *Methods*, 134(1), 9–21. <https://doi.org/10.1016/j.jneumeth.2003.10.009>
- 1350 Deserno, L., Huys, Q. J. M., Boehme, R., Buchert, R., Heinze, H.-J., Grace, A. A., Dolan, R. J.,  
1351 Heinz, A., & Schlagenhauf, F. (2015). Ventral striatal dopamine reflects behavioral and  
1352 neural signatures of model-based control during sequential decision making. *Proceedings*  
1353 *of the National Academy of Sciences of the United States of America*, 112(5), 1595–1600.  
1354 <https://doi.org/10.1073/pnas.1417219112>

- 1355 Dhawale, A. K., Miyamoto, Y. R., Smith, M. A., & Ölveczky, B. P. (2019). Adaptive Regulation  
1356 of Motor Variability. *Current Biology*, 29(21), 3551-3562.e7.  
1357 <https://doi.org/10.1016/j.cub.2019.08.052>
- 1358 Diedrichsen, J., Hashambhoy, Y., Rane, T., & Shadmehr, R. (2005). Neural Correlates of Reach  
1359 Errors. *Journal of Neuroscience*, 25(43), 9919–9931.  
1360 <https://doi.org/10.1523/JNEUROSCI.1874-05.2005>
- 1361 Dolan, R. J., & Dayan, P. (2013). Goals and Habits in the Brain. *Neuron*, 80(2), 312–325.  
1362 <https://doi.org/10.1016/j.neuron.2013.09.007>
- 1363 Doll, B. B., Bath, K. G., Daw, N. D., & Frank, M. J. (2016). Variability in Dopamine Genes  
1364 Dissociates Model-Based and Model-Free Reinforcement Learning. *The Journal of*  
1365 *Neuroscience: The Official Journal of the Society for Neuroscience*, 36(4), 1211–1222.  
1366 <https://doi.org/10.1523/JNEUROSCI.1901-15.2016>
- 1367 Emeric, E. E., Brown, J. W., Leslie, M., Pouget, P., Stuphorn, V., & Schall, J. D. (2008).  
1368 Performance monitoring local field potentials in the medial frontal cortex of primates:  
1369 Anterior cingulate cortex. *Journal of Neurophysiology*, 99(2), 759–772.  
1370 <https://doi.org/10.1152/jn.00896.2006>
- 1371 Enge, S., Mothes, H., Fleischhauer, M., Reif, A., & Strobel, A. (2017). Genetic variation of  
1372 dopamine and serotonin function modulates the feedback-related negativity during  
1373 altruistic punishment. *Scientific Reports*, 7(1), 2996. [https://doi.org/10.1038/s41598-017-](https://doi.org/10.1038/s41598-017-02594-3)  
1374 [02594-3](https://doi.org/10.1038/s41598-017-02594-3)
- 1375 Feigin, A., Ghilardi, M. F., Carbon, M., Edwards, C., Fukuda, M., Dhawan, V., Margouleff, C.,  
1376 Ghez, C., & Eidelberg, D. (2003). Effects of levodopa on motor sequence learning in



- 1377            Parkinson's disease. *Neurology*, *60*(11), 1744–1749.
- 1378            <https://doi.org/10.1212/01.wnl.0000072263.03608.42>
- 1379 Flöel, A., Breitenstein, C., Hummel, F., Celnik, P., Gingert, C., Sawaki, L., Knecht, S., & Cohen,  
1380            L. G. (2005). Dopaminergic influences on formation of a motor memory. *Annals of*  
1381            *Neurology*, *58*(1), 121–130. <https://doi.org/10.1002/ana.20536>
- 1382 Forster, S. E., Zirnheld, P., Shekhar, A., Steinhauer, S. R., O'Donnell, B. F., & Hetrick, W. P.  
1383            (2017). Event-related potentials reflect impaired temporal interval learning following  
1384            haloperidol administration. *Psychopharmacology*, *234*(17), 2545–2562.  
1385            <https://doi.org/10.1007/s00213-017-4645-2>
- 1386 Foti, D., Weinberg, A., Dien, J., & Hajcak, G. (2011). Event-related potential activity in the  
1387            basal ganglia differentiates rewards from nonrewards: Temporospacial principal  
1388            components analysis and source localization of the feedback negativity. *Human Brain*  
1389            *Mapping*, *32*(12), 2207–2216. <https://doi.org/10.1002/hbm.21182>
- 1390 Frank, M. J., Seeberger, L. C., & O'reilly, R. C. (2004). By carrot or by stick: Cognitive  
1391            reinforcement learning in parkinsonism. *Science (New York, N.Y.)*, *306*(5703), 1940–  
1392            1943. <https://doi.org/10.1126/science.1102941>
- 1393 Frank, M. J., Woroach, B. S., & Curran, T. (2005). Error-Related Negativity Predicts  
1394            Reinforcement Learning and Conflict Biases. *Neuron*, *47*(4), 495–501.  
1395            <https://doi.org/10.1016/j.neuron.2005.06.020>
- 1396 Galea, J. M., Mallia, E., Rothwell, J., & Diedrichsen, J. (2015). The dissociable effects of  
1397            punishment and reward on motor learning. *Nature Neuroscience*, *18*(4), 597–602.  
1398            <https://doi.org/10.1038/nn.3956>

- 1399 García-García, I., Zeighami, Y., & Dagher, A. (2017). Reward Prediction Errors in Drug  
1400 Addiction and Parkinson's Disease: From Neurophysiology to Neuroimaging. *Current*  
1401 *Neurology and Neuroscience Reports*, 17(6), 46. [https://doi.org/10.1007/s11910-017-](https://doi.org/10.1007/s11910-017-0755-9)  
1402 0755-9
- 1403 Gardner, M. P. H., Schoenbaum, G., & Gershman, S. J. (2018). Rethinking dopamine as  
1404 generalized prediction error. *Proceedings. Biological Sciences*, 285(1891).  
1405 <https://doi.org/10.1098/rspb.2018.1645>
- 1406 Gehring, W. J., & Willoughby, A. R. (2002). The Medial Frontal Cortex and the Rapid  
1407 Processing of Monetary Gains and Losses. *Science*, 295(5563), 2279–2282.  
1408 <https://doi.org/10.1126/science.1066893>
- 1409 Gläscher, J., Daw, N., Dayan, P., & O'Doherty, J. P. (2010). States versus rewards: Dissociable  
1410 neural prediction error signals underlying model-based and model-free reinforcement  
1411 learning. *Neuron*, 66(4), 585–595. <https://doi.org/10.1016/j.neuron.2010.04.016>
- 1412 Graef, S., Biele, G., Krugel, L. K., Marzinzik, F., Wahl, M., Wotka, J., Klostermann, F., &  
1413 Heekeren, H. R. (2010). Differential influence of levodopa on reward-based learning in  
1414 Parkinson's disease. *Frontiers in Human Neuroscience*, 4, 169.  
1415 <https://doi.org/10.3389/fnhum.2010.00169>
- 1416 Hansenne, M., Pitchot, W., Gonzalez Moreno, A., Papart, P., Timsit-Berthier, M., & Ansseau,  
1417 M. (1995). Catecholaminergic function and P300 amplitude in major depressive disorder  
1418 (P300 and catecholamines). *Electroencephalography and Clinical Neurophysiology*,  
1419 96(2), 194–196. [https://doi.org/10.1016/0168-5597\(94\)00317-8](https://doi.org/10.1016/0168-5597(94)00317-8)
- 1420 Hauser, T. U., Iannaccone, R., Stämpfli, P., Drechsler, R., Brandeis, D., Walitza, S., & Brem, S.  
1421 (2014). The feedback-related negativity (FRN) revisited: New insights into the

- 1422            localization, meaning and network organization. *NeuroImage*, *84*, 159–168.
- 1423            <https://doi.org/10.1016/j.neuroimage.2013.08.028>
- 1424    Hiebert, N. M., Seergobin, K. N., Vo, A., Ganjavi, H., & MacDonald, P. A. (2014).
- 1425            Dopaminergic therapy affects learning and impulsivity in Parkinson’s disease. *Annals of*
- 1426            *Clinical and Translational Neurology*, *1*(10), 833–843. <https://doi.org/10.1002/acn3.128>
- 1427    Holland, P., Codol, O., & Galea, J. M. (2018). Contribution of explicit processes to
- 1428            reinforcement-based motor learning. *Journal of Neurophysiology*, *119*(6), 2241–2255.
- 1429            <https://doi.org/10.1152/jn.00901.2017>
- 1430    Holland, P., Codol, O., Oxley, E., Taylor, M., Hamshire, E., Joseph, S., Huffer, L., & Galea, J.
- 1431            M. (2019). Domain-Specific Working Memory, But Not Dopamine-Related Genetic
- 1432            Variability, Shapes Reward-Based Motor Learning. *The Journal of Neuroscience*, *39*(47),
- 1433            9383–9396. <https://doi.org/10.1523/JNEUROSCI.0583-19.2019>
- 1434    Holroyd, C. B., & Coles, M. G. H. (2002). The neural basis of human error processing:
- 1435            Reinforcement learning, dopamine, and the error-related negativity. *Psychological*
- 1436            *Review*, *109*(4), 679–709. <https://doi.org/10.1037/0033-295X.109.4.679>
- 1437    Holroyd, C. B., & Krigolson, O. E. (2007). Reward prediction error signals associated with a
- 1438            modified time estimation task. *Psychophysiology*, *44*(6), 913–917.
- 1439            <https://doi.org/10.1111/j.1469-8986.2007.00561.x>
- 1440    Holroyd, C. B., Pakzad-Vaezi, K. L., & Krigolson, O. E. (2008). The feedback correct-related
- 1441            positivity: Sensitivity of the event-related brain potential to unexpected positive
- 1442            feedback. *Psychophysiology*, *45*(5), 688–697. [https://doi.org/10.1111/j.1469-](https://doi.org/10.1111/j.1469-8986.2008.00668.x)
- 1443            [8986.2008.00668.x](https://doi.org/10.1111/j.1469-8986.2008.00668.x)

- 1444 Huang, V. S., Haith, A., Mazzoni, P., & Krakauer, J. W. (2011). Rethinking Motor Learning and  
1445 Savings in Adaptation Paradigms: Model-Free Memory for Successful Actions Combines  
1446 with Internal Models. *Neuron*, *70*(4), 787–801.  
1447 <https://doi.org/10.1016/j.neuron.2011.04.012>
- 1448 Ito, M. (2000). Mechanisms of motor learning in the cerebellum1. *Brain Research*, *886*(1–2),  
1449 237–245. [https://doi.org/10.1016/S0006-8993\(00\)03142-5](https://doi.org/10.1016/S0006-8993(00)03142-5)
- 1450 Izawa, J., & Shadmehr, R. (2011). Learning from Sensory and Reward Prediction Errors during  
1451 Motor Adaptation. *PLOS Computational Biology*, *7*(3), e1002012.  
1452 <https://doi.org/10.1371/journal.pcbi.1002012>
- 1453 Jahanshahi, M., Wilkinson, L., Gahir, H., Dharmaindra, A., Dharmarinda, A., Dharminda, A., &  
1454 Lagnado, D. A. (2010). Medication impairs probabilistic classification learning in  
1455 Parkinson’s disease. *Neuropsychologia*, *48*(4), 1096–1103.  
1456 <https://doi.org/10.1016/j.neuropsychologia.2009.12.010>
- 1457 Jocham, G., & Ullsperger, M. (2009). Neuropharmacology of performance monitoring.  
1458 *Neuroscience and Biobehavioral Reviews*, *33*(1), 48–60.  
1459 <https://doi.org/10.1016/j.neubiorev.2008.08.011>
- 1460 Johnson, J. F., Belyk, M., Schwartz, M., Pinheiro, A. P., & Kotz, S. A. (2019). The role of the  
1461 cerebellum in adaptation: ALE meta-analyses on sensory feedback error. *Human Brain*  
1462 *Mapping*, *40*(13), 3966–3981. <https://doi.org/10.1002/hbm.24681>
- 1463 Keysers, C., Gazzola, V., & Wagenmakers, E.-J. (2020). Using Bayes factor hypothesis testing  
1464 in neuroscience to establish evidence of absence. *Nature Neuroscience*, *23*(7), 788–799.  
1465 <https://doi.org/10.1038/s41593-020-0660-4>

- 1466 Kim, H. E., Parvin, D. E., & Ivry, R. B. (2019). The influence of task outcome on implicit motor  
1467 learning. *ELife*, 8. <https://doi.org/10.7554/eLife.39882>
- 1468 Knecht, S., Breitenstein, C., Bushuven, S., Wailke, S., Kamping, S., Flöel, A., Zwitserlood, P., &  
1469 Ringelstein, E. B. (2004). Levodopa: Faster and better word learning in normal humans.  
1470 *Annals of Neurology*, 56(1), 20–26. <https://doi.org/10.1002/ana.20125>
- 1471 Kooij, K. van der, Wijdenes, L. O., Rigterink, T., Overvliet, K. E., & Smeets, J. B. J. (2018).  
1472 Reward abundance interferes with error-based learning in a visuomotor adaptation task.  
1473 *PLOS ONE*, 13(3), e0193002. <https://doi.org/10.1371/journal.pone.0193002>
- 1474 Krakauer, J. W., Ghilardi, M.-F., Mentis, M., Barnes, A., Veytsman, M., Eidelberg, D., & Ghez,  
1475 C. (2004). Differential Cortical and Subcortical Activations in Learning Rotations and  
1476 Gains for Reaching: A PET Study. *Journal of Neurophysiology*, 91(2), 924–933.  
1477 <https://doi.org/10.1152/jn.00675.2003>
- 1478 Kuling, I. A., de Brouwer, A. J., Smeets, J. B. J., & Flanagan, J. R. (2019). Correcting for natural  
1479 visuo-proprioceptive matching errors based on reward as opposed to error feedback does  
1480 not lead to higher retention. *Experimental Brain Research*, 237(3), 735–741.  
1481 <https://doi.org/10.1007/s00221-018-5456-3>
- 1482 Kulisevsky, J. (2000). Role of dopamine in learning and memory: Implications for the treatment  
1483 of cognitive dysfunction in patients with Parkinson’s disease. *Drugs & Aging*, 16(5),  
1484 365–379. <https://doi.org/10.2165/00002512-200016050-00006>
- 1485 Kwak, Y., Müller, M. L. T. M., Bohnen, N. I., Dayalu, P., & Seidler, R. D. (2010). Effect of  
1486 dopaminergic medications on the time course of explicit motor sequence learning in  
1487 Parkinson’s disease. *Journal of Neurophysiology*, 103(2), 942–949.  
1488 <https://doi.org/10.1152/jn.00197.2009>

- 1489 Lange, K. W., Robbins, T. W., Marsden, C. D., James, M., Owen, A. M., & Paul, G. M. (1992).  
1490 L-dopa withdrawal in Parkinson's disease selectively impairs cognitive performance in  
1491 tests sensitive to frontal lobe dysfunction. *Psychopharmacology*, *107*(2–3), 394–404.  
1492 <https://doi.org/10.1007/BF02245167>
- 1493 Leow, L.-A., de Ruyg, A., Loftus, A. M., & Hammond, G. (2013). Different mechanisms  
1494 contributing to savings and anterograde interference are impaired in Parkinson's disease.  
1495 *Frontiers in Human Neuroscience*, *7*. <https://doi.org/10.3389/fnhum.2013.00055>
- 1496 Leow, L.-A., Loftus, A. M., & Hammond, G. R. (2012). Impaired savings despite intact initial  
1497 learning of motor adaptation in Parkinson's disease. *Experimental Brain Research*,  
1498 *218*(2), 295–304. <https://doi.org/10.1007/s00221-012-3060-5>
- 1499 Leow, L.-A., Marinovic, W., de Ruyg, A., & Carroll, T. J. (2018). Task errors contribute to  
1500 implicit aftereffects in sensorimotor adaptation. *The European Journal of Neuroscience*,  
1501 *48*(11), 3397–3409. <https://doi.org/10.1111/ejn.14213>
- 1502 Leow, L.-A., Marinovic, W., Ruyg, A. de, & Carroll, T. J. (2020). Task Errors Drive Memories  
1503 That Improve Sensorimotor Adaptation. *Journal of Neuroscience*, *40*(15), 3075–3088.  
1504 <https://doi.org/10.1523/JNEUROSCI.1506-19.2020>
- 1505 Lewis, S. J. G., Slabosz, A., Robbins, T. W., Barker, R. A., & Owen, A. M. (2005).  
1506 Dopaminergic basis for deficits in working memory but not attentional set-shifting in  
1507 Parkinson's disease. *Neuropsychologia*, *43*(6), 823–832.  
1508 <https://doi.org/10.1016/j.neuropsychologia.2004.10.001>
- 1509 Li, Y., Wang, L.-Q., & Hu, Y. (2009). Localizing P300 generators in high-density event-related  
1510 potential with fMRI. *Medical Science Monitor: International Medical Journal of*  
1511 *Experimental and Clinical Research*, *15*(3), MT47-53.



- 1512 MacDonald, P. A., MacDonald, A. A., Seergobin, K. N., Tamjeedi, R., Ganjavi, H., Provost, J.-  
1513 S., & Monchi, O. (2011). The effect of dopamine therapy on ventral and dorsal striatum-  
1514 mediated cognition in Parkinson's disease: Support from functional MRI. *Brain: A*  
1515 *Journal of Neurology*, 134(Pt 5), 1447–1463. <https://doi.org/10.1093/brain/awr075>
- 1516 MacLean, S. J., Hassall, C. D., Ishigami, Y., Krigolson, O. E., & Eskes, G. A. (2015). Using  
1517 brain potentials to understand prism adaptation: The error-related negativity and the  
1518 P300. *Frontiers in Human Neuroscience*, 9. <https://doi.org/10.3389/fnhum.2015.00335>
- 1519 Mantini, D., Corbetta, M., Perrucci, M. G., Romani, G. L., & Del Gratta, C. (2009). Large-scale  
1520 brain networks account for sustained and transient activity during target detection.  
1521 *NeuroImage*, 44(1), 265–274. <https://doi.org/10.1016/j.neuroimage.2008.08.019>
- 1522 Marco-Pallarés, J., Cucurell, D., Cunillera, T., Krämer, U. M., Càmara, E., Nager, W., Bauer, P.,  
1523 Schüle, R., Schöls, L., Münte, T. F., & Rodriguez-Fornells, A. (2009). Genetic variability  
1524 in the dopamine system (dopamine receptor D4, catechol-O-methyltransferase)  
1525 modulates neurophysiological responses to gains and losses. *Biological Psychiatry*, 66(2),  
1526 154–161. <https://doi.org/10.1016/j.biopsych.2009.01.006>
- 1527 Marinelli, L., Crupi, D., Di Rocco, A., Bove, M., Eidelberg, D., Abbruzzese, G., & Felice  
1528 Ghilardi, M. (2009). Learning and consolidation of visuo-motor adaptation in Parkinson's  
1529 disease. *Parkinsonism & Related Disorders*, 15(1), 6–11.  
1530 <https://doi.org/10.1016/j.parkreldis.2008.02.012>
- 1531 Marini, P., Ramat, S., Ginestroni, A., & Paganini, M. (2003). Deficit of short-term memory in  
1532 newly diagnosed untreated parkinsonian patients: Reversal after L-dopa therapy.  
1533 *Neurological Sciences: Official Journal of the Italian Neurological Society and of the*

- 1534 *Italian Society of Clinical Neurophysiology*, 24(3), 184–185.
- 1535 <https://doi.org/10.1007/s10072-003-0121-3>
- 1536 Martínez-Horta, S., Riba, J., Bobadilla, R. F. de, Pagonabarraga, J., Pascual-Sedano, B.,  
1537 Antonijoan, R. M., Romero, S., Mañanas, M. À., García-Sánchez, C., & Kulisevsky, J.  
1538 (2014). Apathy in Parkinson's Disease: Neurophysiological Evidence of Impaired  
1539 Incentive Processing. *Journal of Neuroscience*, 34(17), 5918–5926.  
1540 <https://doi.org/10.1523/JNEUROSCI.0251-14.2014>
- 1541 Maschke, M., Gomez, C. M., Ebner, T. J., & Konczak, J. (2004). Hereditary cerebellar ataxia  
1542 progressively impairs force adaptation during goal-directed arm movements. *Journal of*  
1543 *Neurophysiology*, 91(1), 230–238. <https://doi.org/10.1152/jn.00557.2003>
- 1544 Mastriqt, N. M. van, Smeets, J. B. J., & Kooij, K. van der. (2020). Quantifying exploration in  
1545 reward-based motor learning. *PLOS ONE*, 15(4), e0226789.  
1546 <https://doi.org/10.1371/journal.pone.0226789>
- 1547 Mathewson, K. J., Dywan, J., Snyder, P. J., Tays, W. J., & Segalowitz, S. J. (2008). Aging and  
1548 electrocortical response to error feedback during a spatial learning task.  
1549 *Psychophysiology*, 45(6), 936–948. <https://doi.org/10.1111/j.1469-8986.2008.00699.x>
- 1550 Mazzoni, P., & Krakauer, J. W. (2006). An Implicit Plan Overrides an Explicit Strategy during  
1551 Visuomotor Adaptation. *Journal of Neuroscience*, 26(14), 3642–3645.  
1552 <https://doi.org/10.1523/JNEUROSCI.5317-05.2006>
- 1553 McDougle, S. D., Ivry, R. B., & Taylor, J. A. (2016). Taking Aim at the Cognitive Side of  
1554 Learning in Sensorimotor Adaptation Tasks. *Trends in Cognitive Sciences*, 20(7), 535–  
1555 544. <https://doi.org/10.1016/j.tics.2016.05.002>

- 1556 Mehler, D. M. A., Reichenbach, A., Klein, J., & Diedrichsen, J. (2017). Minimizing endpoint  
1557 variability through reinforcement learning during reaching movements involving  
1558 shoulder, elbow and wrist. *PloS One*, *12*(7), e0180803.  
1559 <https://doi.org/10.1371/journal.pone.0180803>
- 1560 Miall, R. Chris, Christensen, L. O. D., Cain, O., & Stanley, J. (2007). Disruption of State  
1561 Estimation in the Human Lateral Cerebellum. *PLOS Biology*, *5*(11), e316.  
1562 <https://doi.org/10.1371/journal.pbio.0050316>
- 1563 Miall, R. Christopher, Jenkinson, N., & Kulkarni, K. (2004). Adaptation to rotated visual  
1564 feedback: A re-examination of motor interference. *Experimental Brain Research*, *154*(2),  
1565 201–210. <https://doi.org/10.1007/s00221-003-1630-2>
- 1566 Miltner, W. H., Braun, C. H., & Coles, M. G. (1997). Event-related brain potentials following  
1567 incorrect feedback in a time-estimation task: Evidence for a “generic” neural system for  
1568 error detection. *Journal of Cognitive Neuroscience*, *9*(6), 788–798.  
1569 <https://doi.org/10.1162/jocn.1997.9.6.788>
- 1570 Mongeon, D., Blanchet, P., & Messier, J. (2013). Impact of Parkinson’s disease and  
1571 dopaminergic medication on adaptation to explicit and implicit visuomotor perturbations.  
1572 *Brain and Cognition*, *81*(2), 271–282. <https://doi.org/10.1016/j.bandc.2012.12.001>
- 1573 Montgomery, D. C., Peck, E. A., & Vining, G. G. (2021). *Introduction to Linear Regression*  
1574 *Analysis*. John Wiley & Sons.
- 1575 Moustafa, A. A., Sherman, S. J., & Frank, M. J. (2008). A dopaminergic basis for working  
1576 memory, learning and attentional shifting in Parkinsonism. *Neuropsychologia*, *46*(13),  
1577 3144–3156. <https://doi.org/10.1016/j.neuropsychologia.2008.07.011>

- 1578 Mueller, E. M., Burgdorf, C., Chavanon, M.-L., Schweiger, D., Hennig, J., Wacker, J., &  
1579 Stemmler, G. (2014). The COMT Val158Met polymorphism regulates the effect of a  
1580 dopamine antagonist on the feedback-related negativity. *Psychophysiology*, *51*(8), 805–  
1581 809. <https://doi.org/10.1111/psyp.12226>
- 1582 Mulert, C., Juckel, G., Giegling, I., Pogarell, O., Leicht, G., Karch, S., Mavrogiorgou, P., Möller,  
1583 H.-J., Hegerl, U., & Rujescu, D. (2006). A Ser9Gly polymorphism in the dopamine D3  
1584 receptor gene (DRD3) and event-related P300 potentials. *Neuropsychopharmacology:*  
1585 *Official Publication of the American College of Neuropsychopharmacology*, *31*(6), 1335–  
1586 1344. <https://doi.org/10.1038/sj.npp.1300984>
- 1587 Nikooyan, A. A., & Ahmed, A. A. (2014). Reward feedback accelerates motor learning. *Journal*  
1588 *of Neurophysiology*, *113*(2), 633–646. <https://doi.org/10.1152/jn.00032.2014>
- 1589 Noble, E. P., Berman, S. M., Ozkaragoz, T. Z., & Ritchie, T. (1994). Prolonged P300 latency in  
1590 children with the D2 dopamine receptor A1 allele. *American Journal of Human Genetics*,  
1591 *54*(4), 658–668.
- 1592 Noohi, F., Boyden, N. B., Kwak, Y., Humfleet, J., Burke, D. T., Müller, M. L. T. M., Bohnen, N.  
1593 I., & Seidler, R. D. (2014). Association of COMT val158met and DRD2 G>T genetic  
1594 polymorphisms with individual differences in motor learning and performance in female  
1595 young adults. *Journal of Neurophysiology*, *111*(3), 628–640.  
1596 <https://doi.org/10.1152/jn.00457.2013>
- 1597 Olanow, W., Schapira, A. H., & Rascol, O. (2000). Continuous dopamine-receptor stimulation in  
1598 early Parkinson's disease. *Trends in Neurosciences*, *23*(10 Suppl), S117-126.  
1599 [https://doi.org/10.1016/s1471-1931\(00\)00030-6](https://doi.org/10.1016/s1471-1931(00)00030-6)

- 1600 Onur, Ö. A., Piefke, M., Lie, C.-H., Thiel, C. M., & Fink, G. R. (2011). Modulatory effects of  
1601 levodopa on cognitive control in young but not in older subjects: A pharmacological  
1602 fMRI study. *Journal of Cognitive Neuroscience*, *23*(10), 2797–2810.  
1603 <https://doi.org/10.1162/jocn.2011.21603>
- 1604 Orban de Xivry, J.-J., & Lefèvre, P. (2015). Formation of model-free motor memories during  
1605 motor adaptation depends on perturbation schedule. *Journal of Neurophysiology*, *113*(7),  
1606 2733–2741. <https://doi.org/10.1152/jn.00673.2014>
- 1607 Otani, S., Daniel, H., Roisin, M.-P., & Crepel, F. (2003). Dopaminergic modulation of long-term  
1608 synaptic plasticity in rat prefrontal neurons. *Cerebral Cortex (New York, N.Y.: 1991)*,  
1609 *13*(11), 1251–1256. <https://doi.org/10.1093/cercor/bhg092>
- 1610 Palidis, D. J., Cashaback, J. G. A., & Gribble, P. L. (2019). Neural signatures of reward and  
1611 sensory error feedback processing in motor learning. *Journal of Neurophysiology*, *121*(4),  
1612 1561–1574. <https://doi.org/10.1152/jn.00792.2018>
- 1613 Pekny, S. E., Izawa, J., & Shadmehr, R. (2015). Reward-dependent modulation of movement  
1614 variability. *The Journal of Neuroscience: The Official Journal of the Society for*  
1615 *Neuroscience*, *35*(9), 4015–4024. <https://doi.org/10.1523/JNEUROSCI.3244-14.2015>
- 1616 Polich, J. (2007). Updating P300: An Integrative Theory of P3a and P3b. *Clinical*  
1617 *Neurophysiology: Official Journal of the International Federation of Clinical*  
1618 *Neurophysiology*, *118*(10), 2128–2148. <https://doi.org/10.1016/j.clinph.2007.04.019>
- 1619 Quattrocchi, G., Monaco, J., Ho, A., Irmen, F., Strube, W., Ruge, D., Bestmann, S., & Galea, J.  
1620 M. (2018). Pharmacological Dopamine Manipulation Does Not Alter Reward-Based  
1621 Improvements in Memory Retention during a Visuomotor Adaptation Task. *ENeuro*,  
1622 *5*(3). <https://doi.org/10.1523/ENEURO.0453-17.2018>

- 1623 Ragazzoni, A., Di Russo, F., Fabbri, S., Pesaresi, I., Di Rollo, A., Perri, R. L., Barloscio, D.,  
1624 Bocci, T., Cosottini, M., & Sartucci, F. (2019). “Hit the missing stimulus”. A  
1625 simultaneous EEG-fMRI study to localize the generators of endogenous ERPs in an  
1626 omitted target paradigm. *Scientific Reports*, 9(1), 3684. [https://doi.org/10.1038/s41598-](https://doi.org/10.1038/s41598-019-39812-z)  
1627 019-39812-z
- 1628 Reynolds, J. N. J., & Wickens, J. R. (2002). Dopamine-dependent plasticity of corticostriatal  
1629 synapses. *Neural Networks*, 15(4), 507–521. [https://doi.org/10.1016/S0893-](https://doi.org/10.1016/S0893-6080(02)00045-X)  
1630 6080(02)00045-X
- 1631 Rothenhoefer, K. M., Costa, V. D., Bartolo, R., Vicario-Feliciano, R., Murray, E. A., &  
1632 Averbeck, B. B. (2017). Effects of Ventral Striatum Lesions on Stimulus-Based versus  
1633 Action-Based Reinforcement Learning. *The Journal of Neuroscience: The Official*  
1634 *Journal of the Society for Neuroscience*, 37(29), 6902–6914.  
1635 <https://doi.org/10.1523/JNEUROSCI.0631-17.2017>
- 1636 Rouder, J. N., Morey, R. D., Speckman, P. L., & Province, J. M. (2012). Default Bayes factors  
1637 for ANOVA designs. *Journal of Mathematical Psychology*, 56(5), 356–374.  
1638 <https://doi.org/10.1016/j.jmp.2012.08.001>
- 1639 Russek, E. M., Momennejad, I., Botvinick, M. M., Gershman, S. J., & Daw, N. D. (2017).  
1640 Predictive representations can link model-based reinforcement learning to model-free  
1641 mechanisms. *PLoS Computational Biology*, 13(9), e1005768.  
1642 <https://doi.org/10.1371/journal.pcbi.1005768>
- 1643 Sabeti, M., Katebi, S. D., Rastgar, K., & Azimifar, Z. (2016). A multi-resolution approach to  
1644 localize neural sources of P300 event-related brain potential. *Computer Methods and*  
1645 *Programs in Biomedicine*, 133, 155–168. <https://doi.org/10.1016/j.cmpb.2016.05.013>



- 1646 Sambrook, T. D., & Goslin, J. (2015). A neural reward prediction error revealed by a meta-  
1647 analysis of ERPs using great grand averages. *Psychological Bulletin*, *141*(1), 213–235.  
1648 <http://dx.doi.org.proxy1.lib.uwo.ca/10.1037/bul0000006>
- 1649 Sambrook, T. D., & Goslin, J. (2016). Principal components analysis of reward prediction errors  
1650 in a reinforcement learning task. *NeuroImage*, *124*, 276–286.  
1651 <https://doi.org/10.1016/j.neuroimage.2015.07.032>
- 1652 Sambrook, T. D., Hardwick, B., Wills, A. J., & Goslin, J. (2018). Model-free and model-based  
1653 reward prediction errors in EEG. *NeuroImage*, *178*, 162–171.  
1654 <https://doi.org/10.1016/j.neuroimage.2018.05.023>
- 1655 Santesso, D. L., Evins, A. E., Frank, M. J., Schetter, E. C., Bogdan, R., & Pizzagalli, D. A.  
1656 (2009). Single dose of a dopamine agonist impairs reinforcement learning in humans:  
1657 Evidence from event-related potentials and computational modeling of striatal-cortical  
1658 function. *Human Brain Mapping*, *30*(7), 1963–1976.
- 1659 Schultz, W., Dayan, P., & Montague, P. R. (1997). A neural substrate of prediction and reward.  
1660 *Science*, *275*(5306), 1593–1599.
- 1661 Schutte, I., Deschamps, P. K. H., van Harten, P. N., & Kenemans, J. L. (2020). Dopaminergic  
1662 and noradrenergic manipulation of anticipatory reward and probability event-related  
1663 potentials. *Psychopharmacology*, *237*(7), 2019–2030. [https://doi.org/10.1007/s00213-](https://doi.org/10.1007/s00213-020-05515-x)  
1664 [020-05515-x](https://doi.org/10.1007/s00213-020-05515-x)
- 1665 Shadmehr, R., Smith, M. A., & Krakauer, J. W. (2010). Error correction, sensory prediction, and  
1666 adaptation in motor control. *Annual Review of Neuroscience*, *33*, 89–108.  
1667 <https://doi.org/10.1146/annurev-neuro-060909-153135>

- 1668 Shahar, N., Moran, R., Hauser, T. U., Kievit, R. A., McNamee, D., Moutoussis, M., NSPN  
1669 Consortium, & Dolan, R. J. (2019). Credit assignment to state-independent task  
1670 representations and its relationship with model-based decision making. *Proceedings of*  
1671 *the National Academy of Sciences of the United States of America*, 116(32), 15871–  
1672 15876. <https://doi.org/10.1073/pnas.1821647116>
- 1673 Sharp, M. E., Foerde, K., Daw, N. D., & Shohamy, D. (2016). Dopamine selectively remediates  
1674 “model-based” reward learning: A computational approach. *Brain: A Journal of*  
1675 *Neurology*, 139(Pt 2), 355–364. <https://doi.org/10.1093/brain/awv347>
- 1676 Shmuelof, L., Huang, V. S., Haith, A. M., Delnicki, R. J., Mazzoni, P., & Krakauer, J. W.  
1677 (2012). Overcoming motor “forgetting” through reinforcement of learned actions. *The*  
1678 *Journal of Neuroscience: The Official Journal of the Society for Neuroscience*, 32(42),  
1679 14617–14621. <https://doi.org/10.1523/JNEUROSCI.2184-12.2012>
- 1680 Sidarta, A., Vahdat, S., Bernardi, N. F., & Ostry, D. J. (2016). Somatic and Reinforcement-Based  
1681 Plasticity in the Initial Stages of Human Motor Learning. *The Journal of Neuroscience:*  
1682 *The Official Journal of the Society for Neuroscience*, 36(46), 11682–11692.  
1683 <https://doi.org/10.1523/JNEUROSCI.1767-16.2016>
- 1684 Sidarta, A., van Vugt, F. T., & Ostry, D. J. (2018). Somatosensory working memory in human  
1685 reinforcement-based motor learning. *Journal of Neurophysiology*, 120(6), 3275–3286.  
1686 <https://doi.org/10.1152/jn.00442.2018>
- 1687 Sing, G. C., & Smith, M. A. (2010). Reduction in Learning Rates Associated with Anterograde  
1688 Interference Results from Interactions between Different Timescales in Motor  
1689 Adaptation. *PLoS Computational Biology*, 6(8).  
1690 <https://doi.org/10.1371/journal.pcbi.1000893>

- 1691 Singh, P., Lenka, A., Stezin, A., Jhunjhunwala, K., Pal, P. K., Ghosal, A., & Murthy, A. (2019).  
1692 Basal ganglia contributions during the learning of a visuomotor rotation: Effect of  
1693 dopamine, deep brain stimulation and reinforcement. *The European Journal of*  
1694 *Neuroscience*, 50(8), 3349–3364. <https://doi.org/10.1111/ejn.14494>
- 1695 Smith, M. A., & Shadmehr, R. (2005). Intact Ability to Learn Internal Models of Arm Dynamics  
1696 in Huntington’s Disease But Not Cerebellar Degeneration. *Journal of Neurophysiology*,  
1697 93(5), 2809–2821. <https://doi.org/10.1152/jn.00943.2004>
- 1698 Sohn, Y. H., Kim, G. W., Huh, K., & Kim, J. S. (1998). Dopaminergic influences on the P300  
1699 abnormality in Parkinson’s disease. *Journal of the Neurological Sciences*, 158(1), 83–87.  
1700 [https://doi.org/10.1016/s0022-510x\(98\)00102-6](https://doi.org/10.1016/s0022-510x(98)00102-6)
- 1701 Soltani, M., & Knight, R. T. (2000). Neural origins of the P300. *Critical Reviews in*  
1702 *Neurobiology*, 14(3–4), 199–224.
- 1703 Stanzione, P., Fattapposta, F., Giunti, P., D’Alessio, C., Tagliati, M., Affricano, C., & Amabile,  
1704 G. (1991). P300 variations in parkinsonian patients before and during dopaminergic  
1705 monotherapy: A suggested dopamine component in P300. *Electroencephalography and*  
1706 *Clinical Neurophysiology*, 80(5), 446–453. [https://doi.org/10.1016/0168-5597\(91\)90093-](https://doi.org/10.1016/0168-5597(91)90093-d)  
1707 [d](https://doi.org/10.1016/0168-5597(91)90093-d)
- 1708 Stanzione, P., Fattapposta, F., Tagliati, M., D’Alessio, C., Marciani, M. G., Foti, A., & Amabile,  
1709 G. (1990). Dopaminergic pharmacological manipulations in normal humans confirm the  
1710 specificity of the visual (PERG-VEP) and cognitive (P300) electrophysiological  
1711 alterations in Parkinson’s disease. *Electroencephalography and Clinical*  
1712 *Neurophysiology. Supplement*, 41, 216–220. [https://doi.org/10.1016/b978-0-444-81352-](https://doi.org/10.1016/b978-0-444-81352-7.50026-1)  
1713 [7.50026-1](https://doi.org/10.1016/b978-0-444-81352-7.50026-1)

- 1714 Swainson, R., Rogers, R. D., Sahakian, B. J., Summers, B. A., Polkey, C. E., & Robbins, T. W.  
1715 (2000). Probabilistic learning and reversal deficits in patients with Parkinson's disease or  
1716 frontal or temporal lobe lesions: Possible adverse effects of dopaminergic medication.  
1717 *Neuropsychologia*, 38(5), 596–612. [https://doi.org/10.1016/s0028-3932\(99\)00103-7](https://doi.org/10.1016/s0028-3932(99)00103-7)
- 1718 Synofzik, M., Lindner, A., & Thier, P. (2008). The cerebellum updates predictions about the  
1719 visual consequences of one's behavior. *Current Biology: CB*, 18(11), 814–818.  
1720 <https://doi.org/10.1016/j.cub.2008.04.071>
- 1721 Takeshita, S., & Ogura, C. (1994). Effect of the dopamine D2 antagonist sulpiride on event-  
1722 related potentials and its relation to the law of initial value. *International Journal of*  
1723 *Psychophysiology: Official Journal of the International Organization of*  
1724 *Psychophysiology*, 16(1), 99–106. [https://doi.org/10.1016/0167-8760\(94\)90046-9](https://doi.org/10.1016/0167-8760(94)90046-9)
- 1725 Tanaka, H., Sejnowski, T. J., & Krakauer, J. W. (2009). Adaptation to Visuomotor Rotation  
1726 Through Interaction Between Posterior Parietal and Motor Cortical Areas. *Journal of*  
1727 *Neurophysiology*, 102(5), 2921–2932. <https://doi.org/10.1152/jn.90834.2008>
- 1728 Taylor, J. A., Krakauer, J. W., & Ivry, R. B. (2014). Explicit and Implicit Contributions to  
1729 Learning in a Sensorimotor Adaptation Task. *Journal of Neuroscience*, 34(8), 3023–  
1730 3032. <https://doi.org/10.1523/JNEUROSCI.3619-13.2014>
- 1731 Taylor, Jordan A., Klemfuss, N. M., & Ivry, R. B. (2010). An explicit strategy prevails when the  
1732 cerebellum fails to compute movement errors. *Cerebellum (London, England)*, 9(4), 580–  
1733 586. <https://doi.org/10.1007/s12311-010-0201-x>
- 1734 Therrien, A. S., & Bastian, A. J. (2015). Cerebellar damage impairs internal predictions for  
1735 sensory and motor function. *Current Opinion in Neurobiology*, 33, 127–133.  
1736 <https://doi.org/10.1016/j.conb.2015.03.013>

- 1737 Therrien, A. S., Wolpert, D. M., & Bastian, A. J. (2016). Effective reinforcement learning  
1738 following cerebellar damage requires a balance between exploration and motor noise.  
1739 *Brain*, 139(1), 101–114. <https://doi.org/10.1093/brain/awv329>
- 1740 Torta, D. M. E., Castelli, L., Zibetti, M., Lopiano, L., & Geminiani, G. (2009). On the role of  
1741 dopamine replacement therapy in decision-making, working memory, and reward in  
1742 Parkinson’s disease: Does the therapy-dose matter? *Brain and Cognition*, 71(2), 84–91.  
1743 <https://doi.org/10.1016/j.bandc.2009.04.003>
- 1744 Tseng, Y., Diedrichsen, J., Krakauer, J. W., Shadmehr, R., & Bastian, A. J. (2007). Sensory  
1745 Prediction Errors Drive Cerebellum-Dependent Adaptation of Reaching. *Journal of*  
1746 *Neurophysiology*, 98(1), 54–62. <https://doi.org/10.1152/jn.00266.2007>
- 1747 van der Helden, J., Boksem, M. A. S., & Blom, J. H. G. (2010). The importance of failure:  
1748 Feedback-related negativity predicts motor learning efficiency. *Cerebral Cortex (New*  
1749 *York, N.Y.: 1991)*, 20(7), 1596–1603. <https://doi.org/10.1093/cercor/bhp224>
- 1750 van der Kooij, K., & Smeets, J. B. J. (2019). Reward-based motor adaptation can generalize  
1751 across actions. *Journal of Experimental Psychology: Learning, Memory, and Cognition*,  
1752 45(1), 71–81. <https://doi.org/10.1037/xlm0000573>
- 1753 Vezoli, J., & Procyk, E. (2009). Frontal feedback-related potentials in nonhuman primates:  
1754 Modulation during learning and under haloperidol. *The Journal of Neuroscience: The*  
1755 *Official Journal of the Society for Neuroscience*, 29(50), 15675–15683.  
1756 <https://doi.org/10.1523/JNEUROSCI.4943-09.2009>
- 1757 Vo, A., Seergobin, K. N., & MacDonald, P. A. (2017). Effects of levodopa on stimulus-response  
1758 learning versus response selection in healthy young adults. *Behavioural Brain Research*,  
1759 317, 553–561. <https://doi.org/10.1016/j.bbr.2016.10.019>

- 1760 Vo, A., Seergobin, K. N., & MacDonald, P. A. (2018). Independent effects of age and levodopa  
1761 on reversal learning in healthy volunteers. *Neurobiology of Aging*, *69*, 129–139.  
1762 <https://doi.org/10.1016/j.neurobiolaging.2018.05.014>
- 1763 Vo, A., Seergobin, K. N., Morrow, S. A., & MacDonald, P. A. (2016). Levodopa impairs  
1764 probabilistic reversal learning in healthy young adults. *Psychopharmacology*, *233*(14),  
1765 2753–2763. <https://doi.org/10.1007/s00213-016-4322-x>
- 1766 Walsh, M. M., & Anderson, J. R. (2012). Learning from experience: Event-related potential  
1767 correlates of reward processing, neural adaptation, and behavioral choice. *Neuroscience*  
1768 *and Biobehavioral Reviews*, *36*(8), 1870–1884.  
1769 <https://doi.org/10.1016/j.neubiorev.2012.05.008>
- 1770 Wang, J. X., Kurth-Nelson, Z., Kumaran, D., Tirumala, D., Soyer, H., Leibo, J. Z., Hassabis, D.,  
1771 & Botvinick, M. (2018). Prefrontal cortex as a meta-reinforcement learning system.  
1772 *Nature Neuroscience*, *21*(6), 860–868. <https://doi.org/10.1038/s41593-018-0147-8>
- 1773 Warren, C. M., Hyman, J. M., Seamans, J. K., & Holroyd, C. B. (2015). Feedback-related  
1774 negativity observed in rodent anterior cingulate cortex. *Journal of Physiology-Paris*,  
1775 *109*(1), 87–94. <https://doi.org/10.1016/j.jphysparis.2014.08.008>
- 1776 Watabe-Uchida, M., Eshel, N., & Uchida, N. (2017). Neural Circuitry of Reward Prediction  
1777 Error. *Annual Review of Neuroscience*, *40*, 373–394. [https://doi.org/10.1146/annurev-  
1778 neuro-072116-031109](https://doi.org/10.1146/annurev-neuro-072116-031109)
- 1779 Wetzels, R., Matzke, D., Lee, M. D., Rouder, J. N., Iverson, G. J., & Wagenmakers, E.-J. (2011).  
1780 Statistical Evidence in Experimental Psychology: An Empirical Comparison Using 855 t  
1781 Tests. *Perspectives on Psychological Science: A Journal of the Association for*  
1782 *Psychological Science*, *6*(3), 291–298. <https://doi.org/10.1177/1745691611406923>



- 1783 Wolpert, D. M., Ghahramani, Z., & Jordan, M. I. (1995). An internal model for sensorimotor  
1784 integration. *Science*, 269(5232), 1880–1882. <https://doi.org/10.1126/science.7569931>
- 1785 Wong, A. L., Marvel, C. L., Taylor, J. A., & Krakauer, J. W. (2019). Can patients with cerebellar  
1786 disease switch learning mechanisms to reduce their adaptation deficits? *Brain: A Journal*  
1787 *of Neurology*, 142(3), 662–673. <https://doi.org/10.1093/brain/awy334>
- 1788 Wunderlich, K., Smittenaar, P., & Dolan, R. J. (2012). Dopamine enhances model-based over  
1789 model-free choice behavior. *Neuron*, 75(3), 418–424.  
1790 <https://doi.org/10.1016/j.neuron.2012.03.042>
- 1791
